# ***The Drosophila Baramicin polypeptide gene protects against fungal infection***

M.A. Hanson<sup>1\*</sup>, L.B. Cohen<sup>2</sup>, A. Marra<sup>1</sup>, I. Iatsenko<sup>1,3</sup>, S.A. Wasserman<sup>2</sup>, and B. Lemaitre<sup>1</sup>

1 Global Health Institute, School of Life Science, École Polytechnique Fédérale de Lausanne (EPFL), Lausanne, Switzerland.

2 Division of Biological Sciences, University of California San Diego (UCSD), La Jolla, California, United States of America.

3 Max Planck Institute for Infection Biology, 10117, Berlin, Germany.

\* Corresponding author: M.A. Hanson ([mark.hanson@epfl.ch](mailto:mark.hanson@epfl.ch)), B. Lemaitre ([bruno.lemaitre@epfl.ch](mailto:bruno.lemaitre@epfl.ch))

ORCID IDs:

Hanson: <https://orcid.org/0000-0002-6125-3672>

Cohen: <https://orcid.org/0000-0002-6366-570X>

Iatsenko: <https://orcid.org/0000-0002-9249-8998>

Wasserman: <https://orcid.org/0000-0003-1680-3011>

Lemaitre: <https://orcid.org/0000-0001-7970-1667>

## **Abstract (212 words)**

The fruit fly *Drosophila melanogaster* combats microbial infection by producing a battery of effector peptides that are secreted into the haemolymph. The existence of many effectors that redundantly contribute to host defense has hampered their functional characterization. As a consequence, the logic underlying the role of immune effectors is only poorly defined, and exactly how each gene contributes to survival is not well characterized. Here we describe a novel *Drosophila* antifungal peptide gene that we name *Baramicin A*. We show that *BaraA* encodes a precursor protein cleaved into multiple peptides via furin cleavage sites. *BaraA* is strongly immune-induced in the fat body downstream of the Toll pathway, but also exhibits expression in the nervous system. Importantly, we show that flies lacking *BaraA* are viable but susceptible to a subset of filamentous fungi. Consistent with *BaraA* being directly antimicrobial, overexpression of *BaraA* promotes resistance to fungi and the IM10-like peptides produced by *BaraA* synergistically

inhibit growth of fungi in vitro when combined with a membrane-disrupting antifungal. Surprisingly, *BaraA* males but not females display an erect wing phenotype upon infection, pointing to an adaptive role for *BaraA* on the wing muscle or the nervous system. Collectively, we identify a new antifungal immune effector downstream of Toll signalling, improving our knowledge of the *Drosophila* antimicrobial response.

## Significance statement

Antimicrobial peptides (AMPs) of the innate immune system provide a front line of defence against infection. Recently AMPs have been implicated in physiological processes including inflammation, aging, and neurodegeneration. *Drosophila melanogaster* has been a useful model for understanding AMP functions and specificities in vivo. Here we describe a new *Drosophila* AMP family, *Baramicin*, which protects flies against fungal infection. The *Baramicin* polypeptide structure is also unique amongst animal AMPs, encoding multiple peptides on a single protein precursor cleaved by furin. Furthermore *Baramicin* mutants display a behavioural response to infection, suggesting *Baramicin* AMPs interact with more than just pathogens. *Baramicin* adds to our knowledge of the potent *Drosophila* antifungal response, and to growing observations of AMPs acting in seemingly non-canonical roles.

## Introduction (806 words)

The innate immune response provides the first line of defence against pathogenic infection. This reaction is usually divided into three stages: i) the recognition of pathogens through dedicated pattern recognition receptors, ii) the activation of conserved immune signalling pathways and iii) the production of immune effectors that target invading pathogens [1,2]. The study of invertebrate immune systems has led to key observations of broad relevance, such as the discovery of phagocytosis [3], antimicrobial peptides (AMPs) [4], and the implication of Toll receptors in metazoan immunity[5]. Elucidating immune mechanisms, genes, and signalling pathways has greatly benefited from investigations in the fruit fly *Drosophila melanogaster*, which boasts a large suite of molecular and genetic tools for manipulating the system. One of the best-characterized immune reactions of *Drosophila* is the systemic immune response.

This reaction involves the fat body (an analog of the mammalian liver) producing immune effectors that are secreted into the haemolymph. In *Drosophila*, two NF- $\kappa$ B signalling pathways, the Toll and Imd pathways, regulate most inducible immune effectors: the Toll pathway is predominantly activated in response to infection by Gram-positive bacteria and fungi [5,6], while the immune-deficiency pathway (Imd) responds to the DAP-type peptidoglycan most commonly found in Gram-negative bacteria and a subset of Gram-positive bacteria [7]. These two signalling pathways regulate a transcriptional program that results in the massive synthesis and secretion of humoral effector peptides [6,8]. Accordingly, mutations affecting the Toll and Imd pathways cause extreme susceptibilities to systemic infection that reflect the important contribution of these pathways to host defence. The best-characterized immune effectors downstream of these pathways are antimicrobial peptides (AMPs). AMPs are small and often cationic peptides that disrupt the membranes of microbes, although some have more specific mechanisms [9]. Multiple AMP genes belonging to seven well-characterized families are induced upon systemic infection [10]. However transcriptomic analyses have revealed that the systemic immune response encompasses far more than just the canonical AMPs. Many uncharacterized genes encoding small secreted peptides are induced to high levels downstream of the Toll and Imd pathways, pointing to the role for these peptides as immune effectors [11]. In parallel, MALDI-TOF analyses of the haemolymph of infected flies revealed the induction of 24 peaks - mostly corresponding to uncharacterized peptides - that were named “IMs” for Immune-induced Molecules (IM1-IM24) [8]. Many of the genes that encode these components of the immune peptidic secretome have remained largely unexplored. This is mainly due to the fact that these IMs belong to large gene families of small-sized genes that were until recently difficult to disrupt by mutagenesis.

The CRISPR/Cas9 gene editing approach now allows the necessary precision to delete small genes, singly or in groups, providing the opportunity to dissect effector peptide functions. In 2015 a family of 12 related IM-encoding genes, unified under the name *Bomanins*, were shown to function downstream of Toll. Importantly,

a deletion removing 10 out of the 12 Bomanins revealed their potent contribution to defence against both Gram-positive bacteria and fungi [12]. While Bomanins contribute significantly to Toll-mediated defence, their molecular functions are still unknown and it is unclear if they are directly antimicrobial [13]. Two other IMs encoding IM4 and IM14 (renamed *Daisho1* and *Daisho2*, respectively) were shown to contribute downstream of Toll to resistance against specific fungi. Interestingly, *Daisho* peptides bind to fungal hyphae, suggesting direct antifungal activity [14]. Finally a systematic knock-out analysis of *Drosophila* AMPs revealed that they play an important role in defence against Gram-negative bacteria and some fungi, but surprisingly little against Gram-positive bacteria [15]. An unforeseen finding from these recent studies is the high degree of AMP-pathogen specificity: this is perhaps best illustrated by the specific requirement for *Diptericin*, but not other AMPs, in defence against *Providencia rettgeri* [15,16]. Collectively, these studies in *Drosophila* reveal that immune effectors can be broad or specific in mediating host-pathogen interactions. Understanding the logic of the *Drosophila* effector response will thus require a careful dissection of the remaining uncharacterized IMs.

Previous studies identified an uncharacterized Toll-regulated gene called *IMPPP/CG33470*, which we rename “*BaraA*” (see below), that encodes several IMs, indicating a role in the humoral response. Here, we have improved the annotation of IMs produced by *BaraA* to include: IM10, IM12 (and its sub-peptide IM6), IM13 (and its sub-peptides IM5 and IM8), IM22, and IM24. Using a *BaraA* reporter, we show that *BaraA* is not only immune-induced in the fat body, but also highly expressed in the nervous system. Importantly, we show that flies lacking *BaraA* are viable but susceptible to specific infections, notably by the entomopathogenic fungus *Beauveria bassiana*. Consistent with this, the IM10-like peptides produced by *BaraA* inhibit fungal growth in vitro when combined with the antifungal Pimaricin. Surprisingly, *BaraA* deficient males also display a striking erect wing behaviour upon infection. Collectively, we identify a new antifungal immune effector downstream of Toll signalling, improving our knowledge of the *Drosophila* antimicrobial response.



## Results (2923 words):

### *BaraA is regulated by the Toll pathway*

Previous microarray studies from De Gregorio et al. [11] suggest that *BaraA* is primarily regulated by the Toll pathway, with a minor input from the Imd pathway (**Fig. 1A** and **Fig. S1A-F**). Consistent with this, we found several putative NF- $\kappa$ B binding sites upstream of the *BaraA* gene (guided by previous reports [17–19]). Notably there are two putative binding sites for Relish, the transcription factor of the Imd pathway and three putative binding sites for the Dif/Dorsal transcription factors acting downstream of Toll (**Fig. S1G**). We challenged wild-type flies and Imd or Toll pathway mutants (*Rel<sup>E20</sup>* and *spz<sup>rm7</sup>* respectively) with the Gram-negative bacterium *Escherichia coli*, the yeast *Candida albicans*, or the Gram-positive bacterium *Micrococcus luteus*. RT-qPCR analysis confirms that *BaraA* is induced by infection with *E. coli*, *C. albicans*, or *M. luteus* (**Fig. 1B** and **Fig. S1H**). *BaraA* remains highly inducible in a *Relish* mutant background, albeit at slightly reduced level compared to the wild-type. However *BaraA* expression is abolished in *spz<sup>rm7</sup>* flies. Collectively, the expression pattern of *BaraA* is reminiscent of the antifungal peptide gene *Drosomycin* with a primary input by the Toll pathway and a minor input from the Imd pathway [10,20].

To further characterize the expression of *BaraA*, we generated a *BaraA-Gal4* transgene in which 1675bp of the *BaraA* promoter sequence is fused to the yeast transcription factor Gal4. Use of *BaraA-Gal4>UAS-mCD8-GFP* (referred to as *BaraA>mGFP*) reveals that *BaraA* is strongly induced in the fat body 60h post infection by *M. luteus* (**Fig. 1C**), but less so by *E. coli* pricking (**Fig. S1I**); dissections confirmed this GFP signal is produced by the fat body. Larvae pricked with *M. luteus* also show a robust GFP signal primarily stemming from the fat body when examined 2hpi (**Fig. 1D**). We also observed a strong constitutive GFP signal in the headcase of

164 adults (**Fig. 1E**), including the border of the eyes and the ocelli (**Fig. 1F**). Dissection  
 165 confirmed that the *BaraA* reporter is expressed in brain tissue, notably in the central  
 166 ventral brain furrow. Other consistent signals include GFP in the wing veins and  
 167 subcutaneously along borders of thoracic pleura in adults (**Fig. 1G-H**), and in  
 168 spermatheca of females (**Fig. S1J**). There was also sporadic GFP signal in other  
 169 tissues that included the larval hindgut, the dorsal abdomen of developing pupae,  
 170 and the seminal vesicle of males.

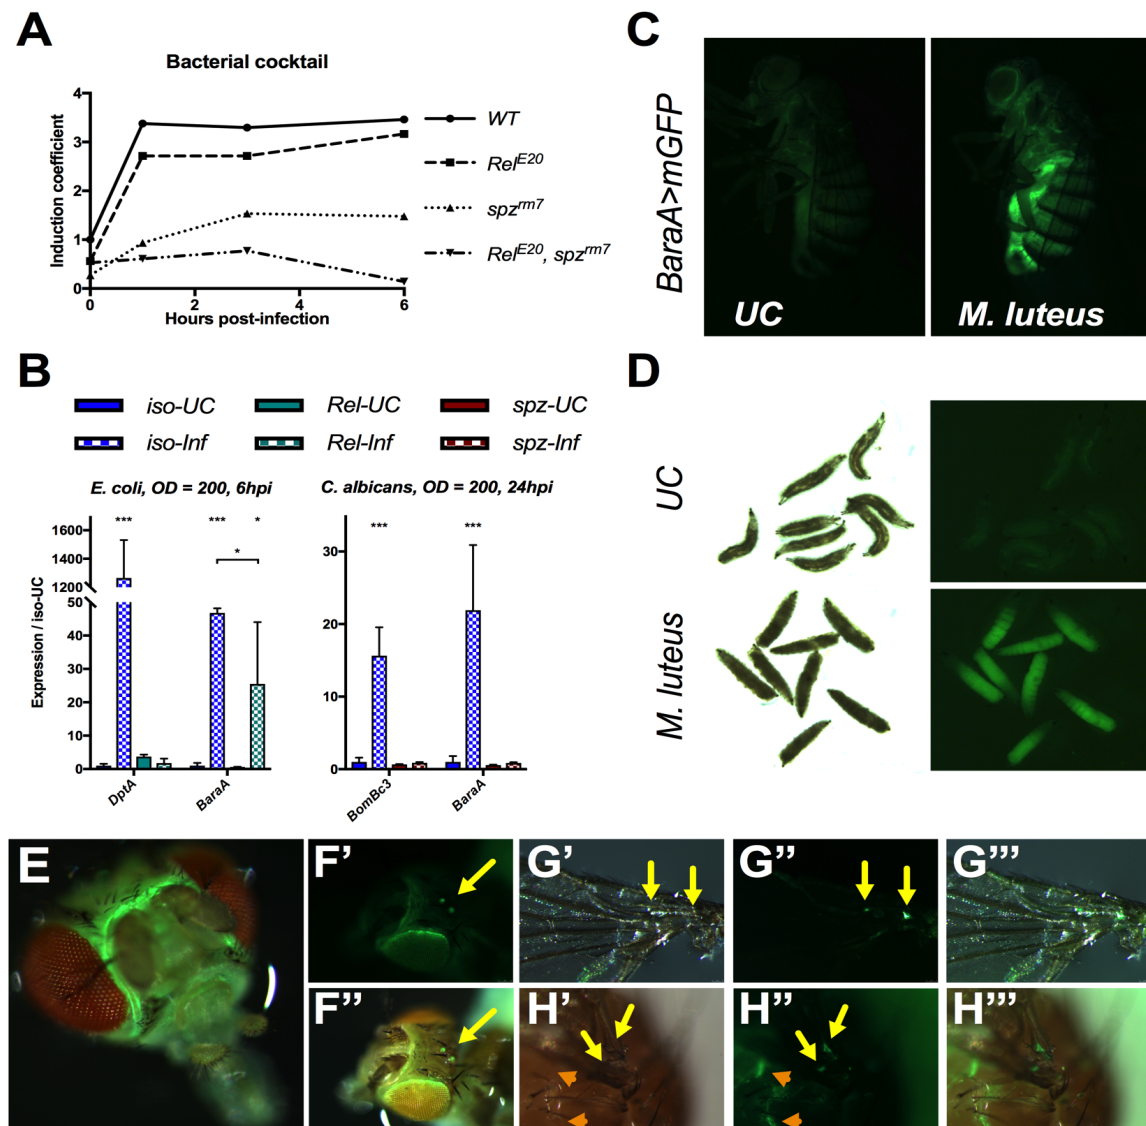

**Figure 1: *BaraA* is an immune-induced gene regulated by the Toll pathway.** **A)** Expression profile of *BaraA* upon bacterial challenge by a mix of *E. coli* and *M. luteus* (values from De Gregorio *et al.* [1]).  $spz^{rm7}$  flies lacking Toll signalling have severely reduced *BaraA* expression, and *BaraA* induction is totally abolished in  $Rel^{E20}$ ,  $spz^{rm7}$  double mutants. **B)** *BaraA* expression profiles in wild-type,  $spz^{rm7}$  and  $Rel^{E20}$  flies upon septic injury with the Gram-negative bacterium *E. coli* and the yeast *C. albicans*. *DptA* and *BomBc3* were used as inducible control genes for the Imd and Toll pathways respectively. Floating asterisks indicate significance relative to *iso-UC* where: \* =  $p < .05$  and, \*\*\* =  $p < .001$ . **C-D)** Use of a *BaraA* reporter (*BaraA-Gal4*; UAS-mCD8-GFP referred to as *BaraA>mGFP*) reveals that *BaraA* is induced upon infection in the fat body of adults (**C**) and in larvae (**D**). Representative images taken 60h (adults) or 2h (larvae) after handling alone (UC) or infection with *M. luteus* (OD=200). **E-H)** *BaraA>mGFP* is highly expressed in the head and central nervous system (**E**), behind the eyes and in the ocelli (**F**), in the wing veins (**G-H** yellow arrows), and beneath the cuticle in the thorax (**H**, orange arrows).

## ***Baramicin A encodes a precursor protein cleaved into multiple peptides***

Previous studies using bioinformatics and proteomics have suggested that four highly immune-induced peptides (IM10, IM12, IM13, and IM24) are encoded in tandem as a single polypeptide precursor by *IMPPP/BaraA* [8,21]. Some less-abundant sub-peptides (IM5, IM6, and IM8) are also produced by additional cleavage of IM12 and IM13 [21]. Using a newly generated null mutant (“*ΔBaraA*,” described below), we analyzed haemolymph samples of infected wild-type and *ΔBaraA* flies by MALDI-TOF analysis. We confirmed the loss of the seven immune-induced peaks corresponding to IMs 5, 6, 8, 10, 12, 13, and 24 in *ΔBaraA* flies (**Fig. 2A**). We also noticed that an additional immune-induced peak at ~5975 Da was absent in our *BaraA* mutants. Upon re-visiting the original studies that annotated the *Drosophila* IMs, we realized this peak corresponded to IM22, whose sequence was never determined [8,21] (see supplementary information for details). We subjected immune-induced haemolymph to LC-MS proteomic analysis following trypsin digestion and found that in addition to the known IMs of *BaraA* (IMs 5, 6, 8, 10, 12, 13, and 24), trypsin-digested fragments of the *BaraA* C-terminus peptide were also detectable in the haemolymph (**Fig. S2**). The range of detected fragments did not match the full length of the C-terminus exactly, as the first four residues were absent in our LC-MS data (a truncation not predicted to arise via trypsin cleavage). The *BaraA* C-terminus lacking these four residues has a calculated mass of 5974.5 Da, exactly matching the observed mass of the IM22 peak absent in *BaraA* mutant flies. Furthermore in other *Drosophila* species these four residues of the *BaraA* C-terminus are an RXRR furin cleavage motif (**Fig. S3A**). IM22 cleavage via this motif should produce the same IM22 domain as seen in *D. melanogaster*. Taken together, we conclude that IM22 is the mature form of the *BaraA* protein C-terminus.

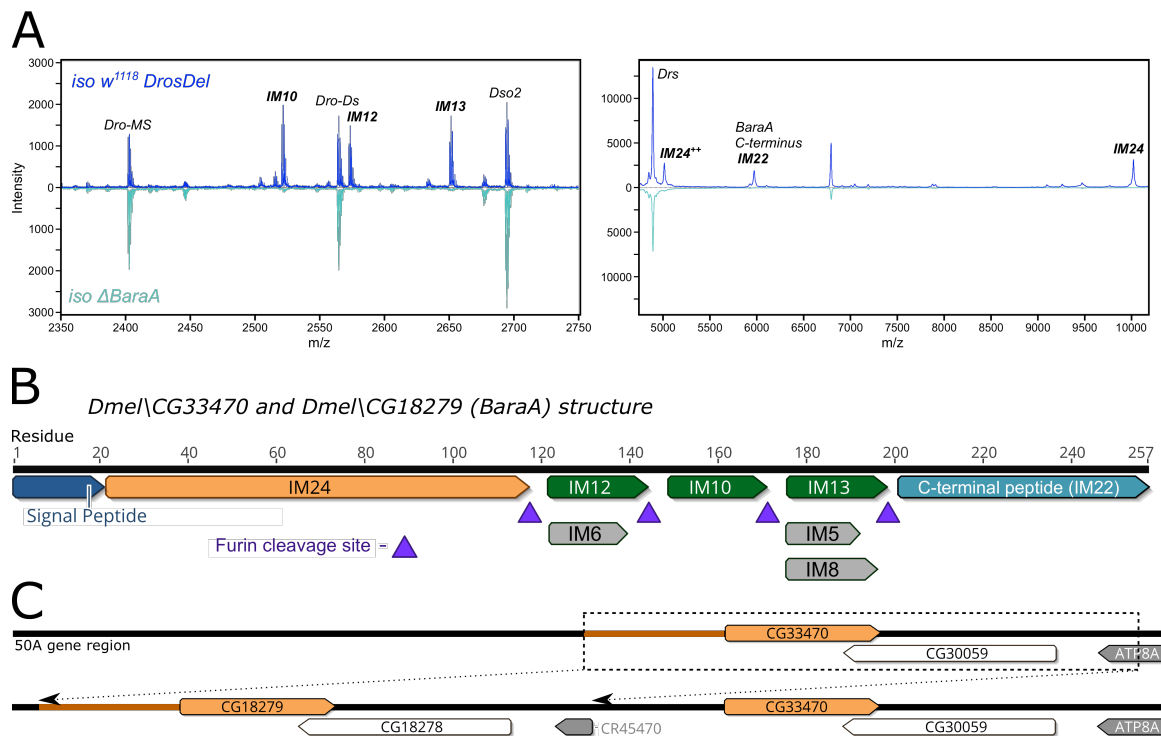

**Figure 2: The Baramicin A polypeptide genes. A)** MALDI-TOF analysis of haemolymph from *iso w<sup>1118</sup>* wild-type and *iso  $\Delta BaraA$*  flies 24 hours post-infection (hpi) confirms that *BaraA* mutants fail to produce the IM10-like and IM24 peptides. *iso  $\Delta BaraA$*  flies also fail to produce an immune-induced peak at ~5794 Da corresponding to IM22 (the C-terminal peptide of *BaraA*, see supplementary information). **B)** The *BaraA* gene encodes a precursor protein that is cleaved into multiple mature peptides at RXRR furin cleavage sites. The sub-peptides IMs 5, 6, and 8 are additional minor cleavage products of IM12 and IM13. **C)** There is a *BaraA* locus duplication event present in the *Dmel*\_R6 reference genome. This duplication is not fixed in laboratory stocks and wild-type flies (Hanson and Lemaitre; in prep).

Thus, a single gene, *BaraA*, contributes to one third of the originally described IMs. These peptides are encoded as a polypeptide precursor interspersed by furin cleavage sites (e.g. RXRR) (**Fig. 2B**). We note that the IM10, IM12 and IM13 peptides are tandem repeats of related peptides, which we collectively refer to as “IM10-like” peptides (**Fig. S3B**). The IM22 peptide also contains a similar motif as the IM10-like peptides (**Fig. S3A-B**), suggesting a related biological activity. We rename this gene “*Baramicin A*” (symbol: *BaraA*) for the Japanese idiom Bara Bara (バラバラ), meaning “to break apart;” a reference to the fragmenting structure of the *Baramicin* precursor protein and its many peptidic products.

## ***A BaraA duplication is present in several laboratory stocks***

Over the course of our investigation, we realized that *IMPPP* (*CG18279*) was identical to its neighbour gene *CG33470* owing to a duplication event of the *BaraA* locus present in the *D. melanogaster* reference genome. The exact nature of this duplication, and its consequence on the immune response is discussed in a separate article (Hanson and Lemaitre; in prep). In brief, the duplication involves the entire *BaraA* gene including over 1kbp of 100% identical promoter sequence, and also the neighbouring sulfatase gene *CG30059* and the 3' terminus of the *ATP8A* gene region (**Fig. 2C**). We distinguish the two daughter genes as *BaraA1* (*CG33470*) and *BaraA2* (*CG18279*). Available sequence data suggests the *BaraA1* and *BaraA2* transcripts are 100% identical. Interestingly, *BaraA* copy number is variable in common lab strains and wild flies, indicating this duplication event is not fixed in *D. melanogaster* (Hanson and Lemaitre; in prep).

## ***Over-expression of BaraA improves the resistance of immune deficient flies***

*Imd*, *Toll* deficient flies are extremely susceptible to microbial infection as they fail to induce hundreds of immune genes, including antimicrobial peptides [11]. It has been shown that over-expression of even a single AMP can improve the resistance of *Imd*, *Toll* deficient flies [22]. As such, immune gene over-expression in *Imd*, *Toll* immune-compromised flies provides a sensitive assay for testing the ability of a gene to contribute to defence independent of other immune effectors. We applied this strategy to *Baramicin A* by generating flies that constitutively express *BaraA* using the ubiquitous *Actin5C-Gal4* driver in an immune-deficient *Rel<sup>E20</sup>*, *spz<sup>rm7</sup>* background (**Fig. 3A**). In these experiments, we pooled results from both males and females due to the very low rate of homozygous *Rel*, *spz* adults, particularly when



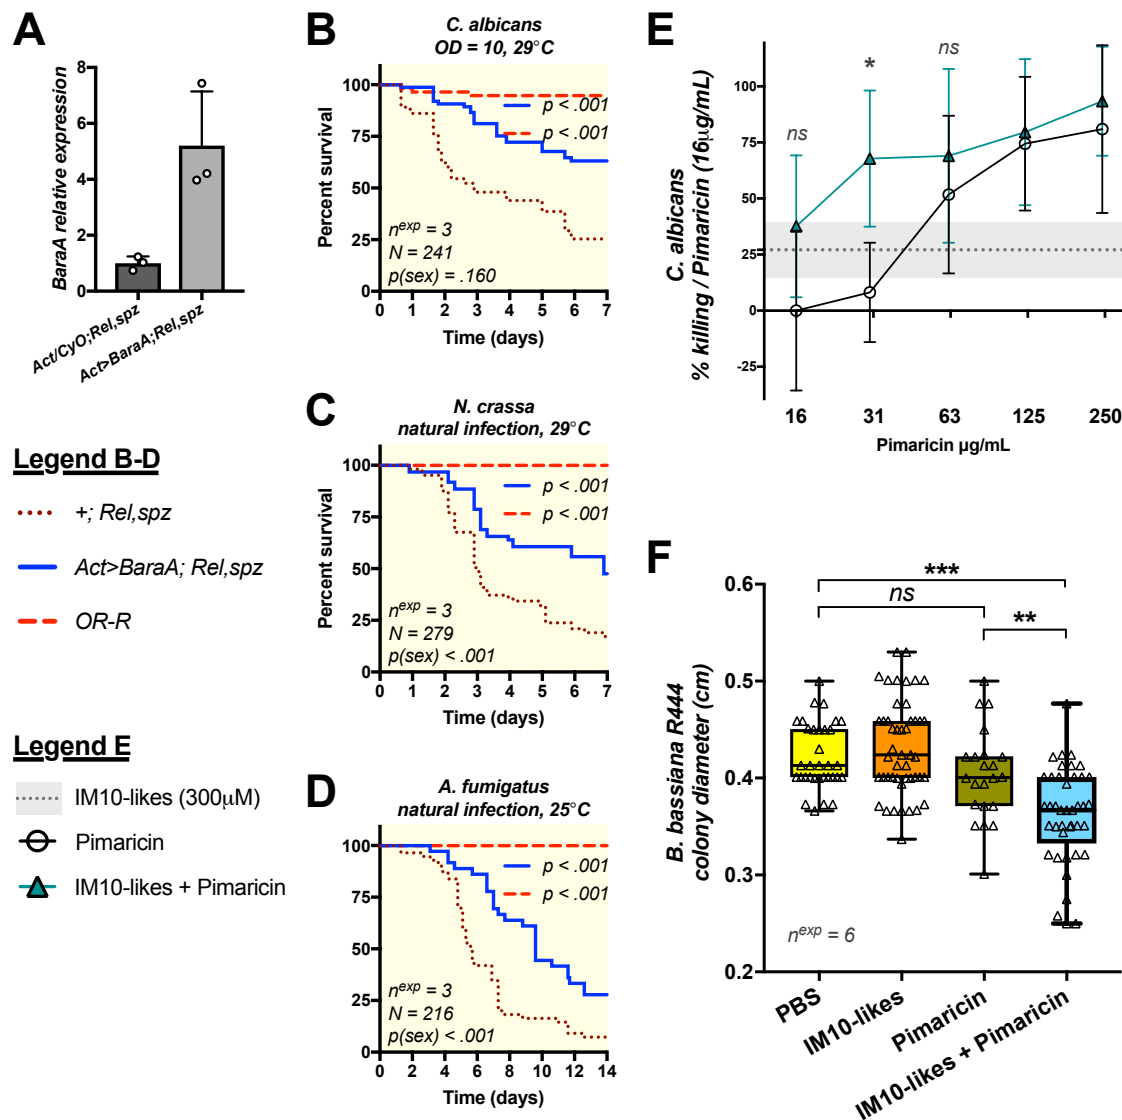

**Figure 3: Overexpression of *BaraA* partially rescues the susceptibility of *Rel, spz* flies against fungi and *BaraA* IM10-like peptides inhibit fungal growth in vitro.** **A)** Validation of the *Act>BaraA* construct in unchallenged flies. **B-D)** Overexpression of *BaraA* (*Act>BaraA*) rescues the susceptibility of *Rel, spz* flies upon systemic infection with *C. albicans* (**B**), or natural infection with either *N. crassa* or *A. fumigatus* (**C-D**). Survivals represent pooled results from males and females (see **Fig. S4** for sex-specific survival curves). **E)** A 300 µM cocktail of the three IM10-like peptides improves the killing activity of the antifungal Pimaricin against *C. albicans* yeast. Error bars and the shaded area (IM10-likes alone) represent  $\pm 1$  standard deviation from the mean. Killing activity (%) was compared against no-peptide controls, then normalized to the activity of Pimaricin alone. **F)** The IM10-like peptide cocktail also synergizes with Pimaricin to inhibit mycelial growth of *B. bassiana* strain R444. The diameters of individual colonies of *B. bassiana* were assessed after four days of growth at 29°C after peptide treatment.



combined with *Actin-Gal4*. Similar trends were seen in both sexes, and separate male and female survival curves are shown in **Fig. S4**.

Ubiquitous *BaraA* expression marginally improved the survival of *Rel, spz* flies upon bacterial infection with *Pectobacterium carotovora* (*Ecc15*) and to a lesser extent *M. luteus* bacteria, while having no effect on *E. coli* (**Fig. S4A-C**). However, ubiquitous expression of *BaraA* provided a more pronounced protective effect against infection by a variety of fungal pathogens. This was true upon pricking with *C. albicans* (**Fig. 3B**), or upon natural infections using *Aspergillus fumigatus* or *Neurospora crassa* filamentous fungi (**Fig. 3C-D**). This over-expression study reveals that *BaraA* alone can partially rescue the susceptibility of *Imd, Toll* deficient flies to infection, and points to a more prominent role for *BaraA* in antifungal defence.

#### ***IM10-like peptides display antifungal activity in vitro***

The *Baramicin A* gene encodes a polypeptide precursor that ultimately produces multiple mature peptides. However the most prominent *BaraA* products are the 23-residue IM10, 12, and 13 peptides (collectively the “IM10-like” peptides); indeed three IM10-like peptides are produced for every one IM24 peptide (**Fig. 2B**), and IM22 also bears an IM10-like motif (**Fig. S3**). This prompted us to explore the in vitro activity of the *BaraA* IM10-like peptides as potential AMPs.

We synthesized IM10, IM12, and IM13 and performed in vitro antimicrobial assays with these three IM10-like peptides using a 1:1:1 cocktail with a final concentration of 300µM (100 µM each of IM10, IM12, and IM13). Using a protocol adapted from Wiegand et al. [23], we monitored the microbicidal activity of this peptide cocktail either alone, or in combination with membrane-disrupting antibiotics that facilitate peptide entry into the cell. We based this approach on previous studies that showed e.g. that the microbicidal activities of Abaecin-like peptides, which target the bacterial DNA chaperone *DnaK*, increase exponentially in combination with a membrane disrupting agent [24–26]. We did not detect any

killing activity of our IM10-like peptide cocktail alone against *Ecc15*, *Enterococcus faecalis*, or *C. albicans*. We also found no activity of IM10-like peptides against *Ecc15* or *E. faecalis* when co-incubated with a sub-lethal dose of Cecropin or Ampicillin respectively. However, we observed a synergistic interaction between IM10-like peptides and the antifungal Pimaricin against *C. albicans* (**Fig. 3E**). Co-incubation of the IM10-like cocktail with Pimaricin significantly improved the killing activity of Pimaricin at 32µg/mL relative to either treatment alone. While not statistically significant, the combination of IM10-like cocktail and Pimaricin also outperformed either the IM10-like cocktail or Pimaricin alone across the entire range of Pimaricin concentrations tested.

We next co-incubated preparations of *B. bassiana* R444 spores under the same conditions as used previously with *C. albicans*, plated 2µL droplets, and assessed the diameters of colonies derived from individual spores after 4 days of growth at 25°C. We found that neither the IM10-like cocktail nor Pimaricin alone affected colony diameter relative to PBS buffer control alone (Tukey's HSD:  $p = 0.775$  and  $0.430$  respectively). However in combination, the IM10-like cocktail plus Pimaricin led to significantly reduced colony size compared to either treatment alone (**Fig. 3F**, Tukey's HSD:  $p = .004$ ). This indicates that incubation with IM10-like peptides and Pimaricin synergistically inhibits *B. bassiana* mycelial growth, revealing an otherwise cryptic antifungal effect of the BaraA IM10-like peptides.

Overall, we found that IM10-like peptides alone do not kill *C. albicans* yeast or impair *B. bassiana* mycelial growth in vitro. However IM10-like peptides seem to synergize with the antifungal Pimaricin to inhibit growth of both of these fungi.

### ***BaraA* deficient flies broadly resist as wild type upon bacterial infection**

To further characterize *BaraA* function, we generated a null mutation of *BaraA* by replacing the 'entire' *BaraA* locus with a dsRed cassette using CRISPR

mediated homology-directed repair in a *w<sup>1118</sup>* genetic background that contains only one *BaraA* gene copy. This mutation (*BaraA<sup>SW1</sup>* hereafter “ $\Delta$ *BaraA*”) was isogenized by seven rounds of backcrossing into the *w<sup>1118</sup>* *DrosDel* isogenic genetic background (*iso w<sup>1118</sup>*) [27] as described in Ferreira et al. [28]. Relevant to this study, both our *iso w<sup>1118</sup>* and *OR-R* wild type lines contain the duplication and thus have both *BaraA1* and *A2* genes, while both copies are absent in  $\Delta$ *BaraA* flies.

We validated these mutant lines by PCR, qPCR and MALDI-TOF peptidomics (Fig. 2A, supplementary data file 1). *BaraA*-deficient flies were viable with no morphological defect. Furthermore,  $\Delta$ *BaraA* flies have wild-type Toll and Imd signalling responses following infection, indicating that *BaraA* is not required for the activation of these signaling cascades (Fig. S5). We next challenged *BaraA* mutant flies using two genetic backgrounds (*w*;  $\Delta$ *BaraA* and *iso*  $\Delta$ *BaraA*) with a variety of pathogens. We included Imd-deficient *Rel<sup>E20</sup>* flies, Toll deficient *spz<sup>rm7</sup>* flies and *Bomanin* deficient *Bom<sup>A55C</sup>* flies as positive controls. We observed that *BaraA* null flies have comparable resistance as wild type to infection with the Gram-negative bacteria *Ecc15* or *Providencia burhodogranariaea* (Fig. S6A-B), or with the Gram-positive bacterium *B. subtilis* (Fig. S6C). In contrast, we saw a mild increase in the susceptibility of *w*;  $\Delta$ *BaraA* flies to infection by the Gram-positive bacterium *E. faecalis* (HR = +0.73, p = .014), which was consistent in *iso*  $\Delta$ *BaraA* flies, although this was not statistically significant (Fig. 4A). This mild susceptibility was also observed using flies carrying the *BaraA* mutation over a deficiency ( $\Delta$ *BaraA/Df(BaraA)*), as well as in flies ubiquitously expressing *BaraA* RNAi (Fig. S7); however none of these sets of survival experiments individually reached statistical significance.

### ***BaraA* mutant flies are highly susceptible to fungal infection**

Entomopathogenic fungi such as *Beauveria bassiana* represent an important class of insect pathogens [6]. They have the ability to directly invade the body cavity

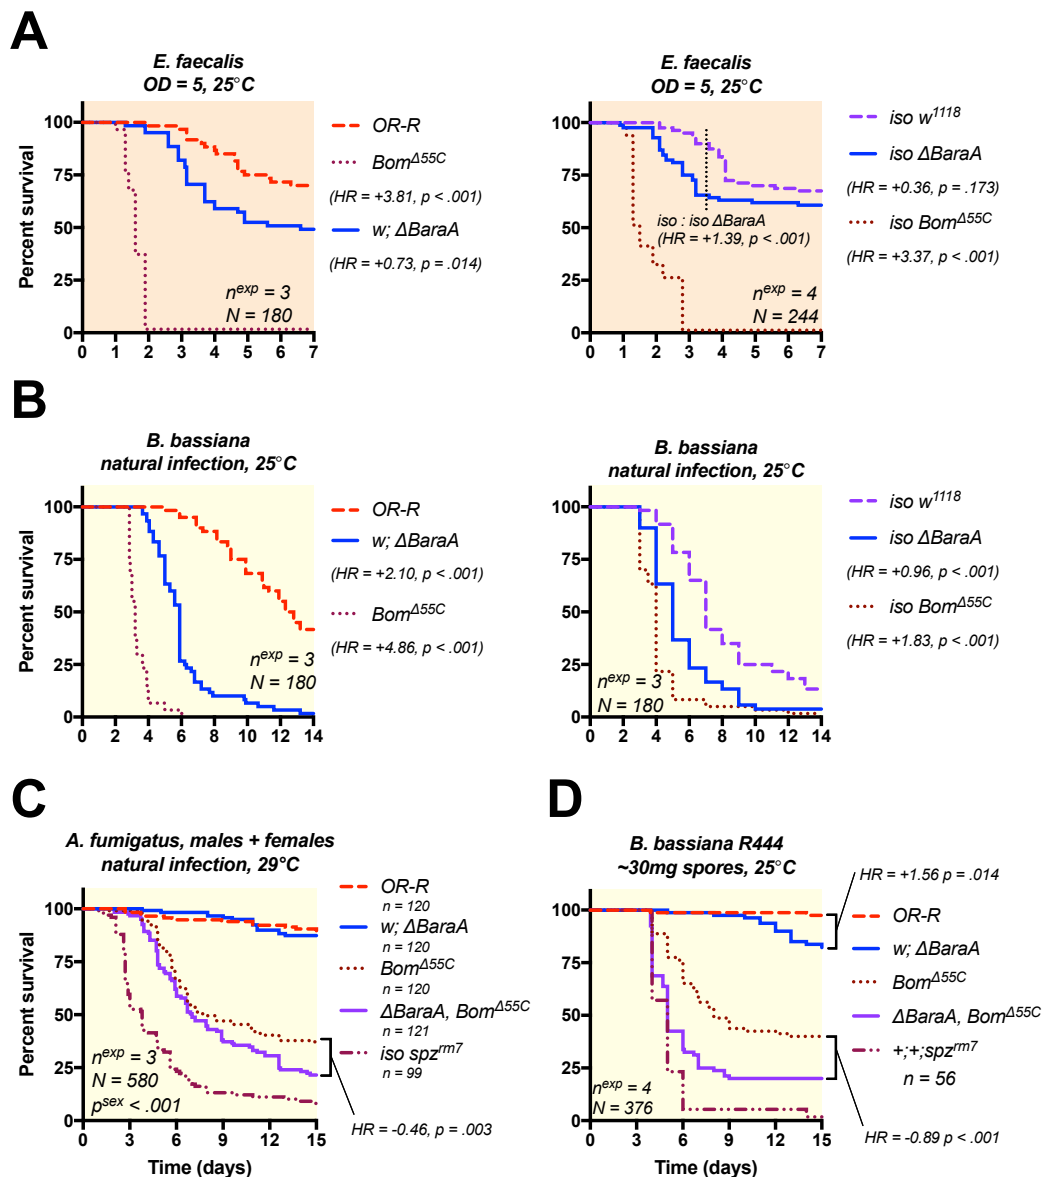

**Figure 4: Δ*BaraA* flies are most susceptible to fungal infection. A) *BaraA* mutants with two different genetic backgrounds (here called *w* or *iso*) display a mild susceptibility to systemic infection with *E. faecalis*. This presents as an earlier mortality in the *iso* background (dotted line). However, survival in *iso* Δ*BaraA* flies was not significantly different from wild type at seven days post-infection ( $p = .173$ ). B) *BaraA* mutants are susceptible to natural infection with the entomopathogenic fungus *B. bassiana*. C-D) Δ*BaraA*, *Bom*<sup>Δ55C</sup> double mutant flies were more susceptible to natural infection with *A. fumigatus* (C) and *B. bassiana* R444 (D) than *Bom*<sup>Δ55C</sup> single mutant flies (also see Fig. S6E-F).**

by crossing through the insect cuticle. The Toll pathway is critical to survive fungal pathogens as it is directly responsible for the expression of *Bomanins*, *Daishos*, *Drosomycin* and *Metchnikowin* antifungal effectors [12,14,15,29,30]. The fact that i) *BaraA* is Toll-regulated, ii) *BaraA* IM10-like peptides have antifungal properties in vitro, and iii) *BaraA* overexpression improves the resistance of *Imd*, *Toll* deficient flies against fungi all point to a role for *BaraA* against fungal pathogens.

We infected *BaraA* mutants and wild-type flies by rolling flies in sporulating *B. bassiana* petri dishes. Strikingly, both *w; ΔBaraA* and *iso ΔBaraA* flies displayed a pronounced susceptibility to natural infection with *B. bassiana* (HR = +2.10 or +0.96 respectively,  $p < .001$  for both) (**Fig. 4B**). An increased susceptibility to fungi was also observed using flies carrying the *BaraA* mutation over a deficiency (**Fig. S8A**) or that ubiquitously express *BaraA* RNAi (**Fig. S8B**). Moreover, constitutive *BaraA* expression (*Act-Gal4>UAS-BaraA*) in an otherwise wild-type background improves survival to *B. bassiana* relative to *Act-Gal4>OR-R* controls (HR = -0.52,  $p = .010$ ) (**Fig. S8C**).

In contrast to the findings with *B. bassiana*, survival analysis revealed only a minor susceptibility of *BaraA* mutants upon infection via injury with *C. albicans* or natural infection with *A. fumigatus* (**Fig. S6D-F**), neither of which reached statistical significance. Collectively, our survival analysis points most strongly to a role for *BaraA* in defence against the entomopathogenic fungus *B. bassiana*.

### ***BaraA* contributes to antifungal defence independent of Bomanins**

Use of compound mutants carrying multiple mutations in effector genes has shown that some of them additively contribute to host resistance to infection. For instance, *Drosomycin*, *Metchnikowin* double mutants are more susceptible than single mutants to *C. albicans* [15]. Compound deletions of immune genes can also reveal contributions of immune effectors that are not detectable via single mutant analysis [31,32]. Recent studies have indicated that *Bomanins* play a major role in

defence against fungi [12,13], though their mechanism of action is unknown. This prompted us to investigate the interaction of *Bomanins* and *BaraA* in defence against fungi. To do this, we recombined the *Bom*<sup>Δ55C</sup> mutation (that removes a cluster of 10 *Bomanin* genes) with *ΔBaraA*. These *w; ΔBaraA, Bom*<sup>Δ55C</sup> double mutant flies were perfectly viable. While natural infection with *Aspergillus fumigatus* did not induce significant mortality in *BaraA* single mutants, we observed that the combined *ΔBaraA* and *Bom*<sup>Δ55C</sup> mutations increases fly susceptibility to this pathogen relative to *Bom*<sup>Δ55C</sup> alone (HR = -0.46, p = .003; **Fig. 4C**).

We next exposed these *ΔBaraA, Bom*<sup>Δ55C</sup> double mutant flies to 30mg of commercial spores of *B. bassiana* R444, which we found to be a less virulent infection model. This is equivalent to approximately 60 million spores, much of which are removed afterwards upon fly grooming. When using this infection method, we found that *BaraA* mutation markedly increases the susceptibility of *Bom* mutant flies (HR = -0.89, p < .001), approaching *spz<sup>rm7</sup>* susceptibility (**Fig. 4D**).

We conclude that the contribution of *BaraA* to defence does not rely on the presence of *Bomanins*, and vice versa. This finding is consistent with the ability of constitutively expressed *BaraA* to improve survival outcome even in *Imd, Toll* deficient flies. Taken together, these results suggest *BaraA* improves survival against fungi independent of other effectors of the systemic immune response, consistent with a direct effect on invading fungi.

### ***ΔBaraA* males display an erect wing phenotype upon infection**

While performing infections with *A. fumigatus*, we observed a high prevalence of *BaraA* mutant flies with upright wings (**Fig. 5A-B**), a phenotype similar to the effect of disrupting the gene encoding the “erect wing” (*ewg*) transcription factor [33]. Curiously, this erect wing phenotype was most specifically observed in males. Upon further observation, erect wing was observed not only upon *A. fumigatus* infection, but also upon infections with all Gram-positive bacteria



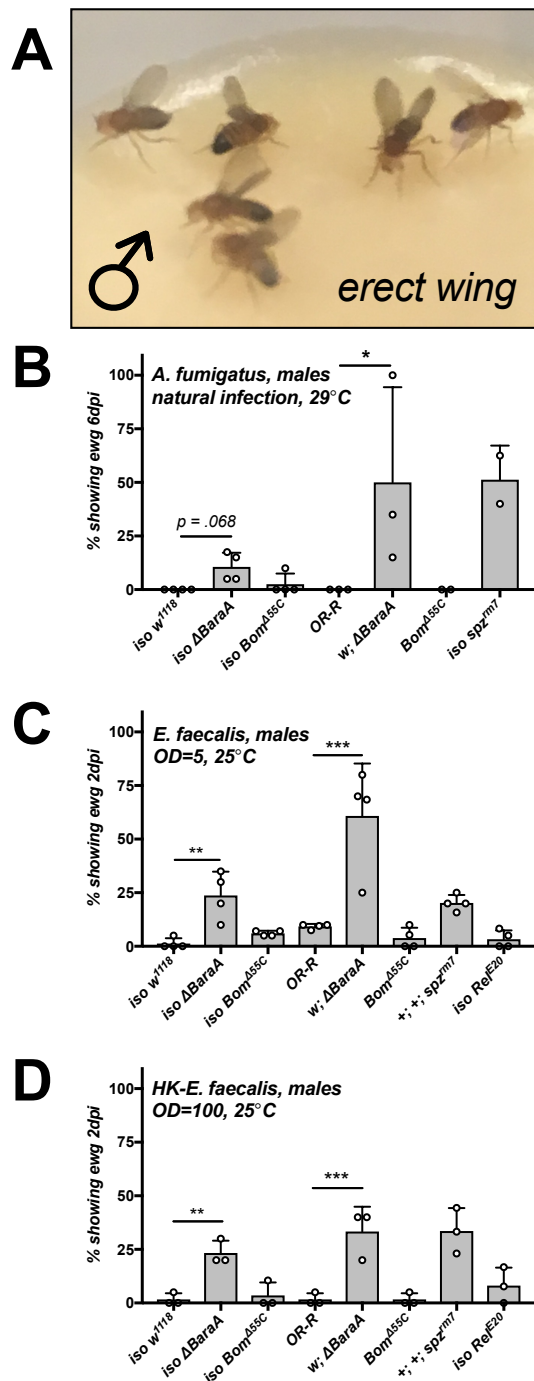

**Figure 5:  $\Delta$ BaraA males display an erect wing phenotype upon infection. A)**  $\Delta$ BaraA males displaying erect wing six days after *A. fumigatus* natural infection. **B-D)** spz<sup>rm7</sup> and  $\Delta$ BaraA males, but not Bom <sup>$\Delta$ 55C</sup> or Rel<sup>E20</sup> flies display the erect wing phenotype upon natural infection with *A. fumigatus* (B), or septic injury with live (C) or heat-killed *E. faecalis* (D). Barplots show the percentage of flies displaying erect wing following treatment, with individual data points reflecting replicate experiments. Additional challenges are shown in Table S1.

and fungi tested (Table S1). Increased prevalence of erect wing flies was observed upon infection with both live (Fig. 5C) and heat-killed *E. faecalis* (Fig. 5D), but less so upon clean injury or via infection with the Gram-negative bacteria *Ecc15*. (Fig. S9A-B). Thus, the erect wing phenotype appears to be observed in *BaraA* mutants in response to stimuli known to activate the Toll pathway, but does not require a live infection.

Such a phenotype in infected males has never been reported, but is reminiscent of the wing extension behaviour of flies infected by the brain-controlling “zombie” fungus *Entomophthora muscae* [34]. Intrigued by this phenotype, we further explored its prevalence in other genetic backgrounds. We next confirmed that this phenotype was also observed in other *BaraA*-deficient backgrounds such as *Df(BaraA)/ $\Delta$ BaraA*; however the penetrance was variable from one



background to another. Erect wing was also observed in  $\Delta BaraA/+$  heterozygous flies ( $Df(BaraA)/+$  or  $\Delta BaraA/+$ ), indicating that the lack of one dose of *BaraA* was sufficient to cause the phenotype (**Fig. S9C** and **Table S1**). Moreover, *spz<sup>rm7</sup>* flies that lack functional Toll signalling phenocopy  $\Delta BaraA$  flies and display erect wing, but other immune-deficient genotypes such as mutants for the Toll-regulated *Bomanin* effectors (*Bom<sup>455C</sup>*), or *Rel<sup>E20</sup>* mutants that lack Imd signalling, do not frequently display erect wing (**Fig. 5C-D**, **Table S1**). Thus the erect wing behaviour is not linked to susceptibility to infection, but rather to loss of *BaraA* upon stimuli triggering the Toll immune pathway. This phenotype suggests an additional effect of *BaraA* on tissues related to the wing muscle or in the nervous system.

## Discussion (1508 words):

Seven *Drosophila* AMPs were identified in the 1980's-1990's either by homology with AMPs characterized in other insects or owing to their abundant production and microbicidal activities in vitro [35]. In the 2000s, genome annotations revealed the existence of many additional paralogous genes from the seven well-defined families of AMPs [36,37]. At that time, microarray and MALDI-TOF analyses also revealed the existence of many more small immune-induced peptides, which may function as AMPs [8,21]. Genetic analyses using loss of function mutations have recently shown that some of these peptides do play an important role in host defence, however key points surrounding their direct microbicidal activities remain unclear. In 2015, *Bomanins* were shown to be critical to host defence using genetic approaches, but to date no activity in vitro has been found [12,13]. Two candidate AMPs, Listericin [38] and GGBP-like3 [39], were shown to inhibit microbial growth upon heterologous expression using S2 cell lines or bacteria respectively. Most recently, Daisho peptides were shown to bind to fungal hyphae ex vivo, and are required for resisting fungal infection in vivo [14]. However the mechanism and direct microbicidal activity of these peptides at physiological concentrations was not assessed.

469

470 In this study, we provide evidence from four separate experimental  
471 approaches that support adding *BaraA* to the list of bona-fide antifungal peptides.  
472 First, the *BaraA* gene is strongly induced in the fat body upon infection resulting in  
473 abundant peptide production. *BaraA* is also tightly regulated by the Toll pathway,  
474 which orchestrates the antifungal response. Second, loss of function study shows  
475 that *BaraA* contributes to resistance against various fungi. Our in vivo analyses  
476 reveal a potential range of activity for *BaraA* in defence against the yeast *C. albicans*,  
477 the mould *A. fumigatus*, and most prominently the entomopathogenic fungus *B.*  
478 *bassiana*; a marginal effect was also seen upon *E. faecalis* bacterial infections. Third,  
479 the antifungal activity of *BaraA* is independent of other key effectors. Over-  
480 expression of *BaraA* in the absence of other inducible peptides increased resistance  
481 of *Imd*, *Toll* deficient flies to *C. albicans*, *A. fumigatus*, and *N. crassa*. Moreover *BaraA*,  
482 *Bomanin* double mutants suffered greater susceptibility than *Bomanin* mutants  
483 alone even against otherwise avirulent fungal pathogens. Lastly, in vitro assays  
484 show that a cocktail of the *BaraA* IM10-like peptides possess antifungal activity  
485 when co-incubated with the membrane disrupting antifungal Pimaricin.

486

487 While it is difficult to estimate the concentration of *BaraA* peptides in the  
488 haemolymph of infected flies, it is expected based on MALDI-TOF peak intensities  
489 that the IM10-like peptides should reach concentrations similar to other AMPs (up  
490 to 100µM) [10,20]; Our in vitro assays used a peptide cocktail at the upper limit of  
491 this range. AMPs are often - but not exclusively - positively charged. This positive  
492 charge is thought to recruit these molecules to negatively charged membranes of  
493 microbes [10]. However the net charges at pH=7 of the IM10-like peptides are: IM10  
494 +1.1, IM12 +0.1, and IM13 -0.9. Given this range of net charge, IM10-like peptides  
495 are not overtly cationic. However some AMPs are antimicrobial without being  
496 positively charged, exemplified by human Dermcidin [40] and anionic peptides of  
497 Lepidoptera that also synergize with membrane-disrupting agents [41]. However  
498 more extensive in vitro experiments with additional fungi should confirm the range

of BaraA peptide activities, and assay the potential activities of IM22 and IM24, which were not included in this study.

Entomopathogenic fungi pose a ubiquitous challenge to insects, and in turn insects use a combination of mechanisms to combat invading fungi. This defence relies largely on humoral factors most notably melanization and the production of host defence peptides. In *Drosophila*, five classes of host defence peptides (plus isoforms) have been shown to contribute to survival against fungi: Drosomycin, Metchnikowin, Bomanins, Daishos, and now the Baramicin A peptides. Additional uncharacterized peptides regulated by the Toll pathway could expand this list further. It is interesting to note that *Baramicin* is found conserved throughout the *Drosophila* genus and in closely related outgroup species (Hanson and Lemaitre; in prep) with a species range similar to *Metchnikowin* and *Daisho*. Meanwhile the most well studied antifungal peptide Drosomycin is in fact specific only to *D. melanogaster* and close relatives. While other AMPs such as the antibacterial peptides Attacin, Cecropin, and Defensin, are conserved across Diptera and other insect orders, antifungal peptide genes found in *Drosophila* appear to be younger [14,42]. The presence of these seemingly novel antifungal genes could be one factor that allows *Drosophila* species to exploit such a wide variety of microbe-infested niches compared to more ecologically restricted insect lineages.

Our study also reveals that the *Baramicin A* gene alone produces at least 1/3 of the initially reported IMs. In addition to the IM10-like peptides and IM24 that were previously assigned to *BaraA* [21], we show IM22 is encoded by the C terminus of *BaraA*, and is conserved in other *Drosophila* species. The production of multiple IMs encoded as tandem repeats between furin cleavage sites is built-in to the *BaraA* protein design akin to a “protein operon.” Such tandem repeat organization is rare, but not totally unique among AMPs. This structure was first described in the bumblebee AMP Apidaecin [43], and has since also been found in Drosocin of *Drosophila neotestacea* [44]. In *D. melanogaster*, several AMPs including Attacin C and its pro-peptide MPAC are also furin-processed, and both parts synergize in

killing bacteria [24]. Therefore furin cleavage in Attacin C enables the precise co-expression of distinct peptides with synergistic activity. It is interesting to note that IM10-like peptides did not show antifungal activity in the absence of membrane disruption by Pimaricin. An attractive hypothesis is that longer peptides encoded by *BaraA* such as IM22 and IM24 could contribute to the antifungal activity of *BaraA* by membrane permeabilization, allowing the internalization of IM10-like peptides. Of note: the IM24 domain is also encoded by two *Baramicin* paralogs named *BaraB* and *BaraC*, which are expressed in the nervous system but do not participate in the inducible immune response (Hanson et al., in prep). This suggests that the IM24 peptidic domain can play a role beyond systemic immunity. The *BaraA* IM24 peptide is a short Glycine-rich peptide (96 AA) that is positively-charged (charge +2.4 at pH=7). These traits are shared by amphipathic membrane-disrupting AMPs such as Attacins, and also neuropeptides that utilize amphipathic domains to accumulate in neuronal membranes [45]. Thus roles for the *Baramicin* IM24 domain in both immunity and neurology are not mutually exclusive.

An unexpected observation of our study is the display of an erect wing phenotype by *BaraA* deficient males upon infection. Our study suggests that this is not a consequence of the genetic background, but rather relies on the activation of the Toll pathway in the absence of *BaraA*. The *erect wing* gene, whose inactivation causes a similar phenotype, is a transcription factor that regulates synaptic growth in developing neuromuscular junctions [33]. This raises the intriguing hypothesis that immune processes downstream of the Toll ligand Spaetzle-somehow affect wing neuromuscular junctions, and that *BaraA* modulates this activity. Another puzzling observation is the sexual dimorphism exhibited for this response. It should be noted that male courtship and aggression displays involve similar wing extension behaviours. Koganezawa et al. [46] showed that males deficient for *Gustatory receptor 32a* (*Gr32a*) failed to unilaterally extend wings during courtship display. *Gr32a*-expressing cells extend into the subesophageal ganglion where they contact mAL, a male-specific set of interneurons involved in unilateral wing display [46]. As erect wing is male-specific, we speculate this *BaraA*-mediated effect might rely on

interactions with such male-specific neurons. *BaraA* is highly produced in the fat body upon infection but also expressed in the nervous system. Further studies should decipher whether the preventative effect of *BaraA* on the erect wing phenotype is cell autonomous or linked to *BaraA* peptides secreted into the haemolymph. Erect wing is also induced by heat-killed bacteria, and is not observed in *Bomanin* or *Relish* mutants, indicating that the erect wing phenotype is not a generic consequence of susceptibility to infection. Recent studies have highlighted how NF- $\kappa$ B signalling in the brain is activated by bacterial peptidoglycan [47], and that immune effectors expressed either by fat body surrounding the brain or from within brain tissue itself affect memory formation [39]. Moreover, an AMP of nematodes regulates aging-dependent neurodegeneration through binding to its G-protein coupled receptor, and this pathway is sufficient to trigger neurodegeneration following infection [48]. Thus immune-inducible AMPs can have striking interactions with neurological processes. Future studies characterizing the role of *BaraA* in the erect wing phenotype should provide insight on interactions between systemic immunity and host physiology.

Here we describe a complex immune effector gene that produces multiple peptide products. *BaraA* encodes many of the most abundant immune effectors induced downstream of the Toll signalling pathway, and indeed *BaraA* promotes survival upon fungal infection. How each peptide contributes to the immune response and/or erect wing behaviour will be informative in understanding the range of effects immune effectors can have on host physiology. This work and others also clarifies how the cocktail of immune effectors produced upon infection acts specifically during innate host defence reactions.

## Materials and methods:

### *Fly genetics and sequence comparisons*

Sequence files were collected from FlyBase [49] and recently-generated sequence data [44,50] and comparisons were made using Geneious R10. Putative NF- $\kappa$ B binding sites were annotated using the Relish motif “GGRDNNHHBS” described in Copley et al. [18] and a manually curated amalgam motif of “GGGHHNNDVH” derived from common Dif binding sites described previously [17,19]. Gene expression analyses were performed using primers described in **Supplementary data file 1**, and further microarray validation for *BaraA* expression comes from De Gregorio et al. [11].

The *UAS-BaraA* and *BaraA-Gal4* constructs were generated using the TOPO pENTR entry vector and cloned into the pTW or pBPGUw Gateway™ vector systems respectively. The *BaraA-Gal4* promoter contains 1675bp upstream of *BaraA1* (but also *BaraA2*, sequence in supplementary information). The *BaraA-Gal4* construct was inserted into the VK33 attP docking site (BDSC line #24871). The *BaraA<sup>SW1</sup>* ( $\Delta$ *BaraA*) mutant was generated using CRISPR with two gRNAs and an HDR vector by cloning 5’ and 3’ region-homologous arms into the pHD-dsRed vector, and consequently  $\Delta$ *BaraA* flies express dsRed in their eyes, ocelli, and abdomen.  $\Delta$ *BaraA* was generated in the Bloomington stock BL51323 as this background contains only one copy of the *BaraA* locus. The induction of the immune response in these flies was validated by qPCR and MALDI-TOF proteomics, wherein we discovered an aberrant *Dso2* locus in the BL51323 background. We thus backcrossed the  $\Delta$ *BaraA* mutation once with a standard *w<sup>1118</sup>* background and screened for wild-type *Dso2* before use in any survival experiments. Additionally,  $\Delta$ *BaraA* was isogenized into the *DrosDel w<sup>1118</sup>* isogenic background for seven generations before use in isogenic fly experiments as described in Ferreira et al. [28].

A full description of fly stocks used for crosses and in experiments is provided in **Supplementary data file 1**.

*Microbe culturing conditions*

Bacteria and *C. albicans* yeast were grown to mid-log phase shaking at 200rpm in their respective growth media (LB, BHI, or YPG) and temperature conditions, and then pelleted by centrifugation to concentrate microbes. Resulting cultures were diluted to the desired optical density at 600nm (OD) for survival experiments as indicated. The following microbes were grown at 37°C: *Escherichia coli* strain 1106 (LB), *Enterococcus faecalis* (BHI), and *Candida albicans* (YPG). The following microbes were grown at 29°C: *Erwinia carotovora carotovora* (Ecc15) (LB) and *Micrococcus luteus* (LB). For filamentous fungi and molds, *Aspergillus fumigatus* was grown at 37°C, and *Neurospora crassa* and *Beauveria bassiana* were grown at room temperature on Malt Agar in the dark until sporulation. *Beauveria bassiana* strain R444 commercial spores were produced by Andermatt Biocontrol, product BB-PROTEC.

#### *Survival experiments*

Survival experiments were performed as previously described [15], with 20 flies per vial with 2-3 replicate experiments. 3-5 day old males were used in experiments unless otherwise specified. For fungi natural infections, flies were flipped at the end of the first day to remove excess fungal spores from the vials. Otherwise, flies were flipped thrice weekly. Statistical analyses were performed using a Cox proportional hazards (CoxPH) model in R 3.6.3. We report the hazard ratio (HR) alongside p-values as a proxy for effect size in survival experiments. Throughout our analyses, we required  $p < .05$  as evidence to report an effect as significant, but note interactions with  $|HR| > 0.5$  as potentially important provided  $\alpha$  approached .05, and tamp down importance of interactions that were significant, but have relatively minor effect size ( $|HR| < 0.5$ ).

#### *Erect wing scoring*



The erect wing phenotype was scored as the number of flies with splayed wings throughout a distinct majority of the period of observation (30s); if unclear, the vial was monitored an additional 30s. Here we define splayed wings as wings not at rest over the back, but did not require wings to be fully upright; on occasion wings were held splayed outward at  $\sim 45^\circ$  relative to the dorsal view, and often slightly elevated relative to the resting state akin to male aggressive displays. Sometimes only one wing was extended, which occurred in both thoracic pricking and fungi natural infections; these flies were counted as having erect wing. In natural infections, the typical course of erect wing display developed in two fashions at early time points, either: i) flies beginning with wings slightly splayed but not fully upright, or ii) flies constantly flitting their wings outward and returning them to rest briefly, only to flit them outward again for extended periods of time. Shortly after infection, some flies were also observed wandering around with wings beating at a furious pace, which was not counted as erect wing. However at later time points erect wing flies settled more permanently on upright splayed wings. Erect wing measurements were taken daily following infection, and erect wing flies over total flies was converted to a percent. Data points in **Fig. 5B-D** represent % with erect wing in individual replicate experiments with  $\sim 20$  flies per vial. Flies stuck in the vial, or where the wings had become sticky or mangled were not included in totals. **Table S1** reports mean percentages across replicate experiments for all pathogens and genotypes where erect wing was monitored. Days post-infection reported in **Table S1** were selected as the final day prior to major incidents of mortality. For *E. faecalis* live infections, *Bom*<sup>*Δ55C*</sup> and *spz*<sup>*rm7*</sup> erect wing was taken at 1dpi due to major mortality events by 2dpi specifically in these lines.

Erect wing measurements were performed in parallel with survival experiments, which often introduced injury to the thorax below the wing possibly damaging flight muscle. It is unlikely that muscle damage explains differences in erect wing display. First: we noticed erect wing initially during natural infections with *A. fumigatus*, and observed erect wing upon *B. bassiana* R444 and *Metarhizium*

*rileyi* PHP1705 natural infections (**Table S1**; *M. rileyi* = NOMU-PROTEC, Andermatt Biocontrol). Second: only 1 of 75 total *iso w*<sup>1118</sup> males displayed erect wing across 4 systemic infection experiments with *E. faecalis*. For comparison: 19 of 80 total *iso ΔBaraA* and 48 of 80 *w; ΔBaraA* flies displayed erect wing (**Table S1**). Future studies might be better served using an abdominal infection mode, which can have different infection dynamics [51]. However we find erect wing display to be robust upon either septic injury or natural infection modes.

#### *IM10-like peptide in vitro activity*

The 23-residue Baramicin peptides were synthesized by GenicBio to a purity of >95%, verified by HPLC. An N-terminal pyroglutamate modification was included based on previous peptidomic descriptions of Baramicins IM10, IM12, and IM13 [52], which we also detected in our LC-MS data (**Fig. S2**). Peptides were dissolved in DMSO and diluted to a working stock of 1200μM in 0.6% DMSO; the final concentration for incubations was 300μM in 0.15% DMSO. For microbe-killing assays, microbes were allowed to grow to log-growth phase, at which point they were diluted to ~50cells/μL. Two μL of culture (~100 cells), and 1μL water or antibiotic was mixed with 1μL of a 1:1:1 cocktail of IM10, IM12, and IM13 peptides to a final concentration of 300μM total peptides; 1μL of water + DMSO (final concentration = 0.15% DMSO) was used as a negative control. Four μL microbe-peptide solutions were incubated for 24h at 4°C. Microbe-peptide cultures were then diluted to a final volume of 100μL and the entire solution was plated on LB agar or BiGGY agar plates. Colonies were counted manually. For combinatorial assays with bacteria, *C. albicans* yeast, and *B. bassiana* R444 spores, peptide cocktails were combined with membrane disrupting antimicrobials effective against relevant pathogens beginning at: 10 μM Cecropin A (Sigma), 500μg/mL ampicillin, or 250μg/mL Pimaricin (commercially available as “Fungin,” InVivogen), serially diluted through to 0.1 μM, 0.5μg/mL, and 4μg/mL respectively.

*Beauveria bassiana* R444 spores were prepared by dissolving ~30mg of spores in 10mL PBS, and then 4μL microbe-peptide solutions were prepared as described for *C. albicans* followed by incubation for 24h at 4°C; this spore density was optimal in our hands to produce distinct individual colonies. Then, 4μL PBS was added to each solution and 2μL droplets were plated on malt agar at 25°C. Colony diameters were measured 4 days after plating by manually analyzing images. Experimental replicates were included as co-variates in One-way ANOVA analysis. The initial dataset approached violating Shapiro-Wilk assumptions of normality (p = 0.061) implemented in R 3.6.3. We subsequently removed four colonies from the analysis, as these outliers were over two standard deviations lower than their respective mean (removed colonies: PBS 0.15cm, PBS 0.25cm, IM10-like+Pimaricin 0.21cm, and a second IM10-like+Pimaricin colony of 0.21cm); the resulting Shapiro-Wilk p-value = 0.294, and both QQ and residual plots suggested a normal distribution. Final killing activities and colony diameters were compared by One-way ANOVA with Holm-Sidak multiple test correction (*C. albicans*) and Tukey's honest significant difference multiple test correction (*B. bassiana* R444).

#### Gene expression analyses

RNA was extracted using TRIzol according to manufacturer's protocol. cDNA was reverse transcribed using Takara Reverse Transcriptase. qPCR was performed using PowerUP mastermix from Applied Biosystems at 60°C using primers listed in **Supplementary data file 1**. Gene expression was quantified using the PFAFFL method [53] with *Rp49* as the reference gene. Statistical analysis was performed by One-way ANOVA with Holm-Sidak's multiple test correction or student's t-test. Error bars represent one standard deviation from the mean.

#### Proteomic analyses

Raw haemolymph samples were collected from immune-challenged flies for MALDI-TOF proteomic analysis as described in [14,15]. MALDI-TOF proteomic signals were confirmed independently at facilities in both San Diego, USA and Lausanne, CH. In brief, haemolymph was collected by capillary and transferred to 0.1% TFA before addition to acetonitrile universal matrix. Representative spectra are shown. Peaks were identified via corresponding m/z values from previous studies [8,21]. Spectra were visualized using mMass, and figures were additionally prepared using Inkscape v0.92.

#### **Author contributions:**

MAH planned experiments, performed bioinformatic analyses, infection experiments, and in vitro assays. BL supervised the project and MAH and BL wrote the manuscript. LC planned and generated the *BaraA* deletion and performed key descriptive experiments and observations. AM assisted with infection and in vitro assays. II, and SAW generated and supplied critical reagents and provided constructive commentary.

#### **Acknowledgements:**

This research was supported by Sinergia grant CRSII5\_186397 and Novartis Foundation 532114 awarded to Bruno Lemaitre, and by National Institute of Health (NIH) grant R01 GM050545 to Steven Wasserman. We thank Jean-Philippe Boquete for assistance with the generation of Gal4 and UAS constructs. We would also like to acknowledge the technical expertise provided by the proteomics and mass spectrometry facilities in both UCSD and EPFL, and specifically Adrien Schmid. The name "*Baramicin*" was partly inspired by Eichero Oda's character "Buggy," a Bara-Bara superhuman. Finally, we further thank Huang et al. (*in preparation*) for their cooperation in publishing initial descriptions of the *BaraA* gene, and for stimulating discussion.

## References:

1. Lemaitre B, Hoffmann J. The Host Defense of *Drosophila Melanogaster*. Annual Review of Immunology. 2007;25: 697–743. doi:10.1146/annurev.immunol.25.022106.141615
2. Kurz CL, Ewbank JJ. *Caenorhabditis elegans*: An emerging genetic model for the study of innate immunity. Nature Reviews Genetics. 2003;4: 380–390. doi:10.1038/nrg1067
3. Kaufmann SHE. Immunology's foundation: the 100-year anniversary of the Nobel Prize to Paul Ehrlich and Elie Metchnikoff. Nat Immunol. 2008;9: 705–712. doi:10.1038/ni0708-705
4. Steiner H, Hultmark D, Engström AA, Bennich H, Boman HG. Sequence and specificity of two antibacterial proteins involved in insect immunity. Nature. 1981;292: 246–248. doi:10.1038/292246a0
5. Lemaitre B, Nicolas E, Michaut L, Reichhart JM, Hoffmann JA. The dorsoventral regulatory gene cassette *spatzle/Toll/Cactus* controls the potent antifungal response in *Drosophila* adults. Cell. 1996;86: 973–983. doi:10.1016/S0092-8674(00)80172-5
6. Lemaitre B, Reichhart JM, Hoffmann JA. *Drosophila* host defense: differential induction of antimicrobial peptide genes after infection by various classes of microorganisms. Proceedings of the National Academy of Sciences of the United States of America. 1997;94: 14614–9. doi:10.1073/pnas.94.26.14614
7. Lemaitre B, Kromer-Metzger E, Michaut L, Nicolas E, Meister M, Georgel P, et al. A recessive mutation, immune deficiency (*imd*), defines two distinct control pathways in the *Drosophila* host defense. Proc Natl Acad Sci U S A. 1995;92: 9465–9469. doi:10.1073/pnas.92.21.9465
8. Uttenweiler-Joseph S, Moniatte M, Lagueux M, Van Dorsselaer a, Hoffmann J a, Bulet P. Differential display of peptides induced during the immune response of *Drosophila*: a matrix-assisted laser desorption ionization time-of-flight mass spectrometry study. Proceedings of the National Academy of Sciences of the United States of America. 1998;95: 11342–11347. doi:10.1073/pnas.95.19.11342
9. Lazzaro BP, Zasloff M, Rolff J. Antimicrobial peptides: Application informed by evolution. Science. 2020;368. doi:10.1126/science.aau5480

- 806 10. Hanson MA, Lemaitre B. New insights on *Drosophila* antimicrobial peptide  
807 function in host defense and beyond. *Curr Opin Immunol.* 2020;62: 22–30.  
808 doi:10.1016/j.coi.2019.11.008
- 809 11. De Gregorio E, Spellman PT, Tzou P, Rubin GM, Lemaitre B. The Toll and Imd  
810 pathways are the major regulators of the immune response in *Drosophila*.  
811 *EMBO Journal.* 2002;21: 2568–2579. doi:10.1093/emboj/21.11.2568
- 812 12. Clemmons AW, Lindsay SA, Wasserman SA. An Effector Peptide Family  
813 Required for *Drosophila* Toll-Mediated Immunity. *PLoS Pathogens.* 2015;11.  
814 doi:10.1371/journal.ppat.1004876
- 815 13. Lindsay SA, Lin SJH, Wasserman SA. Short-Form Bomanins Mediate Humoral  
816 Immunity in *Drosophila*. 2018. doi:10.1159/000489831
- 817 14. Cohen LB, Lindsay SA, Xu Y, Lin SJH, Wasserman SA. The Daisho Peptides  
818 Mediate *Drosophila* Defense Against a Subset of Filamentous Fungi. *Front*  
819 *Immunol.* 2020;11: 9. doi:10.3389/fimmu.2020.00009
- 820 15. Hanson MA, Dostálová A, Ceroni C, Poidevin M, Kondo S, Lemaitre B. Synergy  
821 and remarkable specificity of antimicrobial peptides in vivo using a systematic  
822 knockout approach. *eLife.* 2019;8. doi:10.7554/elife.44341
- 823 16. Unckless RL, Howick VM, Lazzaro BP. Convergent Balancing Selection on an  
824 Antimicrobial Peptide in *Drosophila*. *Current Biology.* 2016;26: 257–262.  
825 doi:10.1016/j.cub.2015.11.063
- 826 17. Busse MS, Arnold CP, Towb P, Katrivesis J, Wasserman SA. A  $\kappa$ B sequence code  
827 for pathway-specific innate immune responses. *EMBO Journal.* 2007;26: 3826–  
828 3835. doi:10.1038/sj.emboj.7601798
- 829 18. Copley RR, Totrov M, Linnell J, Field S, Ragoussis J, Udalova IA. Functional  
830 conservation of Rel binding sites in drosophilid genomes. *Genome Research.*  
831 2007;17: 1327–1335. doi:10.1101/gr.6490707
- 832 19. Tanji T, Yun E-Y, Ip YT. Heterodimers of NF- $\kappa$ B transcription factors DIF and  
833 Relish regulate antimicrobial peptide genes in *Drosophila*. *Proceedings of the*  
834 *National Academy of Sciences.* 2010;107: 14715–14720.  
835 doi:10.1073/pnas.1009473107
- 836 20. Ferrandon D, Jung AC, Cricqui MC, Lemaitre B, Uttenweiler-Joseph S, Michaut L,  
837 et al. A drosomycin-GFP reporter transgene reveals a local immune response in  
838 *Drosophila* that is not dependent on the Toll pathway. *EMBO Journal.* 1998;17:  
839 1217–1227. doi:10.1093/emboj/17.5.1217



- 840 21. Levy F, Rabel D, Charlet M, Bulet P, Hoffmann JA, Ehret-Sabatier L. Peptidomic  
841 and proteomic analyses of the systemic immune response of *Drosophila*.  
842 *Biochimie*. 2004;86: 607–616. doi:10.1016/j.biochi.2004.07.007
- 843 22. Tzou P, Reichhart J-M, Lemaitre B. Constitutive expression of a single  
844 antimicrobial peptide can restore wild-type resistance to infection in  
845 immunodeficient *Drosophila* mutants. *Proceedings of the National Academy of*  
846 *Sciences of the United States of America*. 2002;99: 2152–2157.  
847 doi:10.1073/pnas.042411999
- 848 23. Wiegand I, Hilpert K, Hancock REW. Agar and broth dilution methods to  
849 determine the minimal inhibitory concentration (MIC) of antimicrobial  
850 substances. *Nature Protocols*. 2008. doi:10.1038/nprot.2007.521
- 851 24. Rabel D, Charlet M, Ehret-Sabatier L, Cavicchioli L, Cudic M, Otvos L, et al.  
852 Primary Structure and in Vitro Antibacterial Properties of the *Drosophila*  
853 *melanogaster* Attacin C Pro-domain. *Journal of Biological Chemistry*. 2004;279:  
854 14853–14859. doi:10.1074/jbc.M313608200
- 855 25. Rahnamaeian M, Cytry ska M, Zdybicka-Barabas A, Dobszlaff K, Wiesner J,  
856 Twyman RM, et al. Insect antimicrobial peptides show potentiating functional  
857 interactions against Gram-negative bacteria. *Proceedings of the Royal Society*  
858 *B: Biological Sciences*. 2015;282: 20150293–20150293.  
859 doi:10.1098/rspb.2015.0293
- 860 26. Kragol G, Lovas S, Varadi G, Condie BA, Hoffmann R, Otvos L. The antibacterial  
861 peptide pyrrhocoricin inhibits the ATPase actions of DnaK and prevents  
862 chaperone-assisted protein folding. *Biochemistry*. 2001;40: 3016–3026.  
863 doi:10.1021/bi002656a
- 864 27. Ryder E, Blows F, Ashburner M, Bautista-Llacer R, Coulson D, Drummond J, et  
865 al. The DrosDel collection: A set of P-element insertions for generating custom  
866 chromosomal aberrations in *Drosophila melanogaster*. *Genetics*. 2004;167:  
867 797–813. doi:10.1534/genetics.104.026658
- 868 28. Ferreira ÁG, Naylor H, Esteves SS, Pais IS, Martins NE, Teixeira L. The Toll-  
869 dorsal pathway is required for resistance to viral oral infection in *Drosophila*.  
870 *PLoS Pathog*. 2014;10: e1004507. doi:10.1371/journal.ppat.1004507
- 871 29. Levashina EA, Ohresser S, Bulet P, Reichhart J -M, Hetru C, Hoffmann JA.  
872 Metchnikowin, a Novel Immune-Inducible Proline-Rich Peptide from  
873 *Drosophila* with Antibacterial and Antifungal Properties. *European Journal of*  
874 *Biochemistry*. 1995;233: 694–700. doi:10.1111/j.1432-1033.1995.694\_2.x
- 875 30. Fehlbauer P, Bulet P, Michaut L, Lagueux M, Broekaert WF, Hetru C, et al. Insect  
876 immunity: Septic injury of *drosophila* induces the synthesis of a potent



- 877 antifungal peptide with sequence homology to plant antifungal peptides.  
878 Journal of Biological Chemistry. 1994;269: 33159–33163.
- 879 31. Dudzic JP, Hanson MA, Iatsenko I, Kondo S, Lemaitre B. More Than Black or  
880 White: Melanization and Toll Share Regulatory Serine Proteases in *Drosophila*.  
881 Cell Reports. 2019;27: 1050–1061.e3. doi:10.1016/j.celrep.2019.03.101
- 882 32. Binggeli O, Neyen C, Poidevin M, Lemaitre B. Prophenoloxidase Activation Is  
883 Required for Survival to Microbial Infections in *Drosophila*. PLoS Pathogens.  
884 2014;10. doi:10.1371/journal.ppat.1004067
- 885 33. DeSimone SM, White K. The *Drosophila* erect wing gene, which is important for  
886 both neuronal and muscle development, encodes a protein which is similar to  
887 the sea urchin P3A2 DNA binding protein. Mol Cell Biol. 1993;13: 3641–3649.  
888 doi:10.1128/MCB.13.6.3641
- 889 34. Elya C, Lok TC, Spencer QE, McCausland H, Martinez CC, Eisen M. Robust  
890 manipulation of the behavior of *Drosophila melanogaster* by a fungal pathogen  
891 in the laboratory. eLife. 2018;7: e34414. doi:10.7554/eLife.34414
- 892 35. Imler J-L, Bulet P. Antimicrobial peptides in *Drosophila*: structures, activities  
893 and gene regulation. Chemical immunology and allergy. 2005;86: 1–21.  
894 doi:10.1159/000086648
- 895 36. Hedengren M, Borge K, Hultmark D. Expression and evolution of the *Drosophila*  
896 attacin/diptericin gene family. Biochemical and biophysical research  
897 communications. 2000;279: 574–81. doi:10.1006/bbrc.2000.3988
- 898 37. Khush RS, Lemaitre B. Genes that fight infection: what the *Drosophila* genome  
899 says about animal immunity. Trends Genet. 2000;16: 442–449.  
900 doi:10.1016/s0168-9525(00)02095-3
- 901 38. Goto A, Yano T, Terashima J, Iwashita S, Oshima Y, Kurata S. Cooperative  
902 regulation of the induction of the novel antibacterial Listericin by  
903 peptidoglycan recognition protein LE and the JAK-STAT pathway. J Biol Chem.  
904 2010;285: 15731–15738. doi:10.1074/jbc.M109.082115
- 905 39. Barajas-azpeleta R, Wu J, Gill J, Welte R. Antimicrobial peptides modulate long-  
906 term memory. PLoS Genetics. 2018; 1–26. doi:10.1371/journal.pgen.1007440
- 907 40. Steffen H, Rieg S, Wiedemann I, Kalbacher H, Deeg M, Sahl H-G, et al. Naturally  
908 processed dermicidin-derived peptides do not permeabilize bacterial  
909 membranes and kill microorganisms irrespective of their charge. Antimicrob  
910 Agents Chemother. 2006;50: 2608–2620. doi:10.1128/AAC.00181-06
- 911 41. Zdybicka-Barabas A, Mak P, Klys A, Skrzypiec K, Mendyk E, Fiołka MJ, et al.  
912 Synergistic action of *Galleria mellonella* anionic peptide 2 and lysozyme against

- 913 Gram-negative bacteria. *Biochim Biophys Acta*. 2012;1818: 2623–2635.  
914 doi:10.1016/j.bbame.2012.06.008
- 915 42. Hanson MA, Lemaitre B, Unckless RL. Dynamic Evolution of Antimicrobial  
916 Peptides Underscores Trade-Offs Between Immunity and Ecological Fitness.  
917 *Frontiers in Immunology*. 2019;10: 2620. doi:doi: 10.3389/fimmu.2019.02620
- 918 43. Casteels-Josson K, Capaci T, Casteels P, Tempst P. Apidaecin multipetide  
919 precursor structure: a putative mechanism for amplification of the insect  
920 antibacterial response. *The EMBO journal*. 1993;12: 1569–78.  
921 doi:10.1002/j.1460-2075.1993.tb05801.x
- 922 44. Hanson MA, Hamilton PT, Perlman SJ. Immune genes and divergent  
923 antimicrobial peptides in flies of the subgenus *Drosophila*. *BMC evolutionary*  
924 *biology*. 2016;16: 228. doi:10.1186/s12862-016-0805-y
- 925 45. Brogden KA, Guthmiller JM, Salzert M, Zasloff M. The nervous system and innate  
926 immunity: The neuropeptide connection. *Nature Immunology*. 2005. pp. 558–  
927 564. doi:10.1038/ni1209
- 928 46. Koganezawa M, Haba D, Matsuo T, Yamamoto D. The Shaping of Male Courtship  
929 Posture by Lateralized Gustatory Inputs to Male-Specific Interneurons. *Current*  
930 *Biology*. 2010;20: 1–8. doi:10.1016/j.cub.2009.11.038
- 931 47. Kurz CL, Charroux B, Chaduli D, Viallat-Lieutaud A, Royet J. Peptidoglycan  
932 sensing by octopaminergic neurons modulates *Drosophila* oviposition. *Elife*.  
933 2017;6. doi:10.7554/eLife.21937
- 934 48. Lezi E, Zhou T, Koh S, Chuang M, Sharma R, Pujol N, et al. An Antimicrobial  
935 Peptide and Its Neuronal Receptor Regulate Dendrite Degeneration in Aging  
936 and Infection. *Neuron*. 2018;97: 125-138.e5. doi:10.1016/j.neuron.2017.12.001
- 937 49. Gramates LS, Marygold SJ, Dos Santos G, Urbano JM, Antonazzo G, Matthews BB,  
938 et al. FlyBase at 25: Looking to the future. *Nucleic Acids Research*. 2017;45:  
939 D663–D671. doi:10.1093/nar/gkw1016
- 940 50. Hill T, Koseva BS, Unckless RL. The genome of *Drosophila innubila* reveals  
941 lineage-specific patterns of selection in immune genes. *Molecular Biology and*  
942 *Evolution*. 2019. doi:10.1093/molbev/msz059
- 943 51. Chambers MC, Jacobson E, Khalil S, Lazzaro BP. Thorax injury lowers resistance  
944 to infection in *Drosophila melanogaster*. *Infect Immun*. 2014;82: 4380–4389.  
945 doi:10.1128/IAI.02415-14
- 946 52. Verleyen P, Baggerman G, D’Hertog W, Vierstraete E, Husson SJ, Schoofs L.  
947 Identification of new immune induced molecules in the haemolymph of

948 *Drosophila melanogaster* by 2D-nanoLC MS/MS. Journal of Insect Physiology.  
949 2006;52: 379–388. doi:10.1016/j.jinsphys.2005.12.007

950 53. Pfaffl MW. A new mathematical model for relative quantification in real-time  
951 RT-PCR. Nucleic Acids Res. 2001;29: e45. doi:10.1093/nar/29.9.e45

952 54. Tyler-Cross R, Schirch V. Effects of amino acid sequence, buffers, and ionic  
953 strength on the rate and mechanism of deamidation of asparagine residues in  
954 small peptides. J Biol Chem. 1991;266: 22549–22556.

955

## Supplemental figure captions:

**Figure S1: A-F)** AMP and *BaraA* expression dynamics upon injury with a mixture of *E. coli* and *M. luteus* (A,D,E,F) and natural infection with *B. bassiana* (B,C), from De Gregorio et al. (2002). **A)** *BaraA* immediate expression dynamics are more similar to *Drs* (Toll and some Imd) than *BomBc3* (Toll-specific). **B)** Natural infection by *B. bassiana* results in sustained *BaraA* expression for days. **C)** Fungus-induced *BaraA* expression is abolished in *spz<sup>rm7</sup>* mutants. **D-E)** *BaraA* is induced by bacteria in *Rel<sup>E20</sup>* mutants (**D**), but far less in *spz<sup>rm7</sup>* mutants (**E**). **F)** *BaraA* induction is completely abolished in *Rel, spz* double mutants. **G)** 400bp of upstream sequence from *BaraA* annotated with putative *Rel* or *Dif/dl* binding sites (included in supplemental data file 1). **H)** Expression of *BaraA* in wild-type and *spz<sup>rm7</sup>* flies following injury with the Gram-positive bacteria *M. luteus*. **I)** The *BaraA>mGFP* reporter line shows more robust induction of GFP 60hpi by pricking with *M. luteus* than *E. coli*. **J)** Expression of *BaraA>mGFP* in the spermatheca of females (yellow arrow). Representative images shown.

**Figure S2:** LCMS coverage of trypsin-digested and detected *BaraA* peptides aligned to the protein coding sequence. Peptide fragments cover the whole precursor protein barring furin site-associated motifs. Additionally, two peptide fragments are absent: i) the first 4 residues of the C-terminus (“GIND,” not predicted *a priori*), and ii) the C-terminus peptide’s “RPDGR” motif, which is predicted as a degradation product of Trypsin cleavage and whose size is beyond the minimum range of detection. Without the GIND motif, the mass of the contiguous C-terminus is 5974.5 Da, matching the mass observed by MALDI-TOF for IM22 (**Fig. 2A**). The N-terminal Q residues of IM10, IM12, IM13, and IM24 are pyroglutamate-modified, as described previously [2]. The asparagine residues of IM10-like peptides are sometimes deamidated, likely as a consequence of our 0.1% TFA sample collection method as “NG” motifs are deamidated in acidic conditions [54].

**Figure S3: A)** Aligned IM22 peptides of *Drosophila Baramicin A-like* genes, with the IM10-like ‘VWKRPDGRTV’ motif noted. The GIND residues at the N-terminus are cleaved off in *Dmel\BaraA*, and this site is similarly cleaved at RXRR furin cleavage site in subgenus *Drosophila* flies. **B)** Alignment of the three IM10-like peptides of *D. melanogaster BaraA* with the “VXRPXRTV” motif noted.

**Figure S4: Over-expression of *BaraA* partially rescues *Rel, spz* double mutant susceptibility to infection in both males and females. A)** Overexpressing *BaraA* modestly improves survival of *Rel, spz* flies upon injury with *Ecc15*, though initial mortality closely resembles that of *Rel, spz* controls, and the differences observed in males were not significant ( $p = .106$ ). **B)** Overexpressing *BaraA* did not improve the survival of *Rel, spz* flies upon *E. coli* infection. **C)** Overexpressing *BaraA* only marginally improves survival of *Rel, spz* females, but not males, upon *M. luteus* infections. Infections using a higher dose tended to kill 100% of *Rel, spz* flies regardless of sex or expression of *BaraA*, suggesting that if *BaraA* overexpression

does affect susceptibility to *M. luteus*, this effect is possible within only a narrow window of *M. luteus* concentration. **D-F)** Overexpressing *BaraA* improves survival of *Rel, spz* male and female flies upon injury with *C. albicans* (**D**) or natural infection with *A. fumigatus* (**E**) and *N. crassa* (**F**). P-values are shown for each biological sex in an independent CoxPH model not including the other sex relative to *Rel, spz* as a reference.

**Figure S5:** RT-qPCR shows that the expression of *BomBc3* (**A**) *Drs* (**B**) and *DptA* (**C**) in wild-type 18hpi in *iso ΔBaraA* flies.

**Figure S6: Additional survivals using ΔBaraA flies in two distinct genetic backgrounds upon infection by a diversity of microbes.** **A)** No significant susceptibility of *ΔBaraA* flies to *Ecc15* infection. **B)** *iso ΔBaraA* but not *w; ΔBaraA* flies are susceptible to *P. burhodogranariea*, **C)** *w; ΔBaraA* but not *iso ΔBaraA* flies exhibit a minor susceptibility to *B. subtilis* (HR > 0.5, p = .099). **D)** Both *w; ΔBaraA* and *iso ΔBaraA* exhibit a minor increased susceptibility to *C. albicans*, though the ultimate survival rate was not significantly different from their respective wild-types. Dotted line indicates CoxPH statistical signature when censored at 2dpi. **E-F)** *w; ΔBaraA* males are slightly susceptible to *A. fumigatus* natural infection (HR > 0.5, p = .078), but not females, nor isogenic flies. Additional infections using *ΔBaraA*, *Bom<sup>Δ55C</sup>* double mutant flies reveal that *BaraA* mutation increases the susceptibility of *Bom<sup>Δ55C</sup>* flies in both males and females (cumulative curves shown in **Fig. 4C**). Blue backgrounds = Gram-negative bacteria, orange backgrounds = Gram-positive bacteria, yellow backgrounds = fungi.

**Figure S7: Additional survival analyses reveal only a minor contribution of BaraA to defence against infection by E. faecalis.** **A)** Crossing with a genomic deficiency (*Df(BaraA)*) leads to increased susceptibility in both the *w* background and isogenic DrosDel background, with *Df(BaraA)/ΔBaraA* flies suffering the greatest mortality in either crossing scheme. Both deficiency crosses yielded an earlier susceptibility in *BaraA*-deficient flies (shown with dotted black lines), however neither experiment ultimately reached statistical significance. **B)** *BaraA* RNAi flies (*Act>BaraA-IR*) suffered greater mortality than *Act>OR-R* or *OR-R/BaraA-IR* controls, but this was not statistically significant at α = .05.

**Figure S8: Additional survival analyses reveal a consistent contribution of BaraA to defence against natural infection with B. bassiana.** **A)** Crossing with a genomic deficiency (*Df(BaraA)*) leads to increased susceptibility of *Df(BaraA)/ΔBaraA* flies for both the *w* background and isogenic DrosDel background relative to wild-type controls (p < .05). **B)** *Act>BaraA-IR* flies were more susceptible than *OR>BaraA-IR* (p = .004), although not significantly different from our *Act>OR-R* control (p = .266). **C)** Overexpressing *BaraA* (*Act>UAS-BaraA*) improved survival against *B. bassiana* relative to *Act>OR-R* controls (HR = -0.52, p = 0.010).

**Figure S9: Frequency of erect wing display following additional challenges. A-B)** Erect wing frequencies 2dpi after clean injury **(A)**, or *Ecc15* septic injury **(B)**. The erect wing frequencies of flies pricked by HK-*E. faecalis* **(Fig. 6D)** are overlaid in the background to facilitate direct comparison with the frequency observed upon Toll pathway activation. **C)** The frequency of erect wing display is increased following *E. faecalis* septic injury in  $\Delta BaraA/+$  or *Df(BaraA)/+* flies. Data points are pooled from *w*;  $\Delta BaraA$  and *iso*  $\Delta BaraA$  crosses after *E. faecalis* infections shown in **Fig. S7A** and data in **Table S1**.

**Table S1: Erect wing frequencies from various infection experiments.**

Following initial erect wing observations upon *A. fumigatus* natural infection, we scored erect wing frequency in all subsequent survival experiments. Data represent the mean % of males displaying erect wing  $\pm$  one standard deviation. n exp = number of replicate experiments performed, and dpi ewg taken = days post-infection where erect wing data were recorded. We additionally performed natural infections with *Metarhizium rileyi* that generally did not cause significant mortality in flies, but nevertheless induced erect wing specifically in  $\Delta BaraA$  males and *spz<sup>rm7</sup>* controls. Bacterial infections were performed by septic injury, while fungal challenges were natural infections performed by rolling flies in spores.

Legend (A-F): ■ *BomBc3* —●— *Drs* - - - ▽ *DptA* - - - ▴ *BaraA*

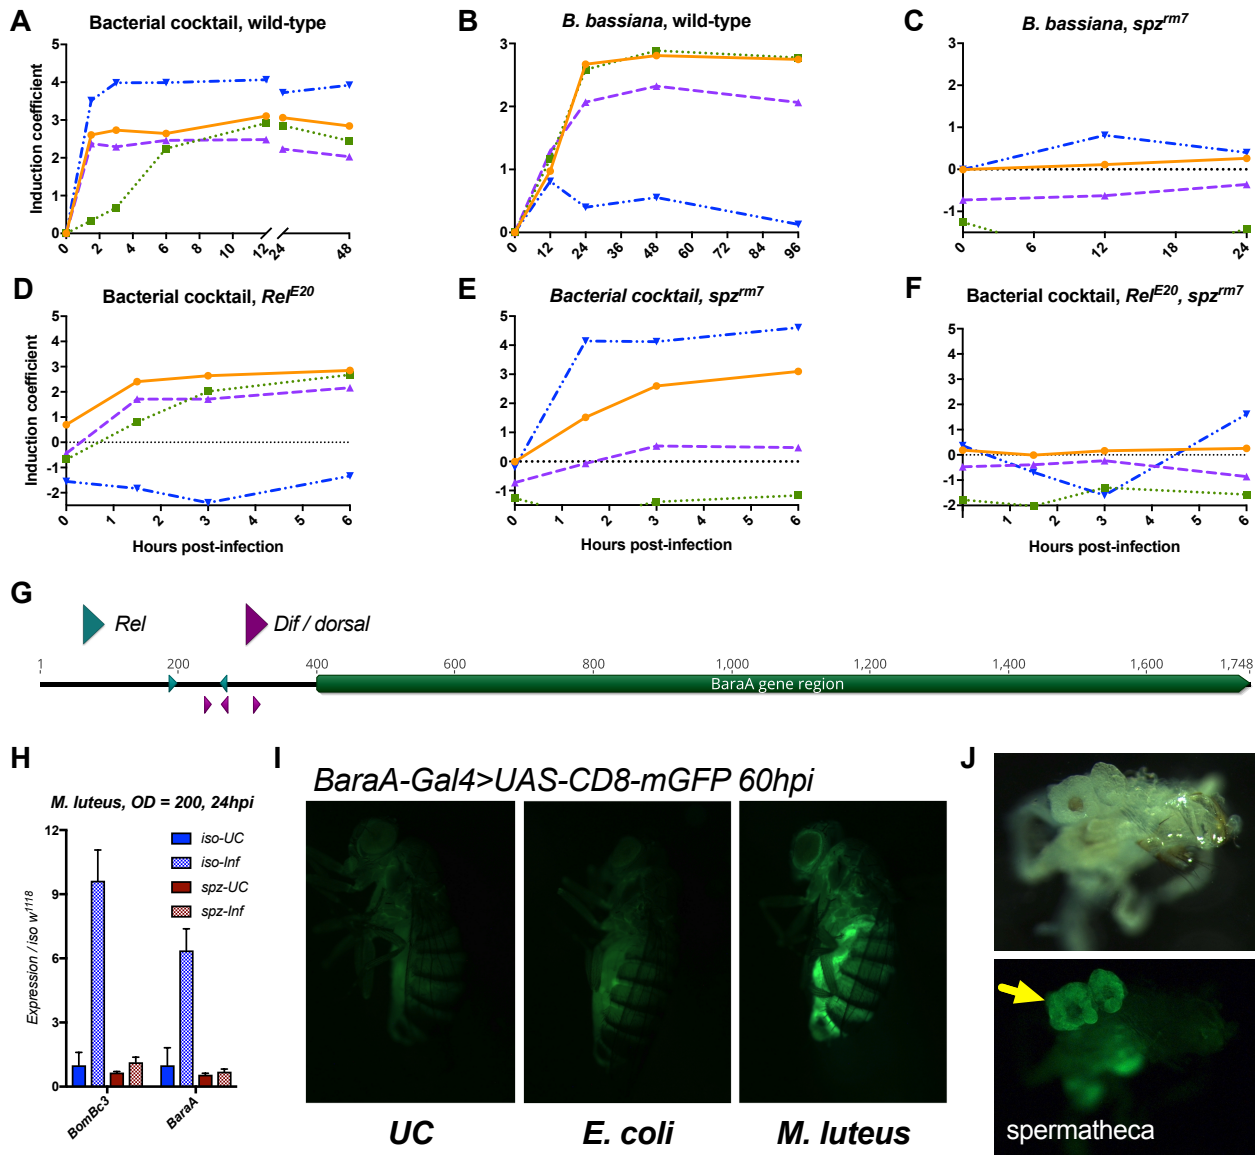



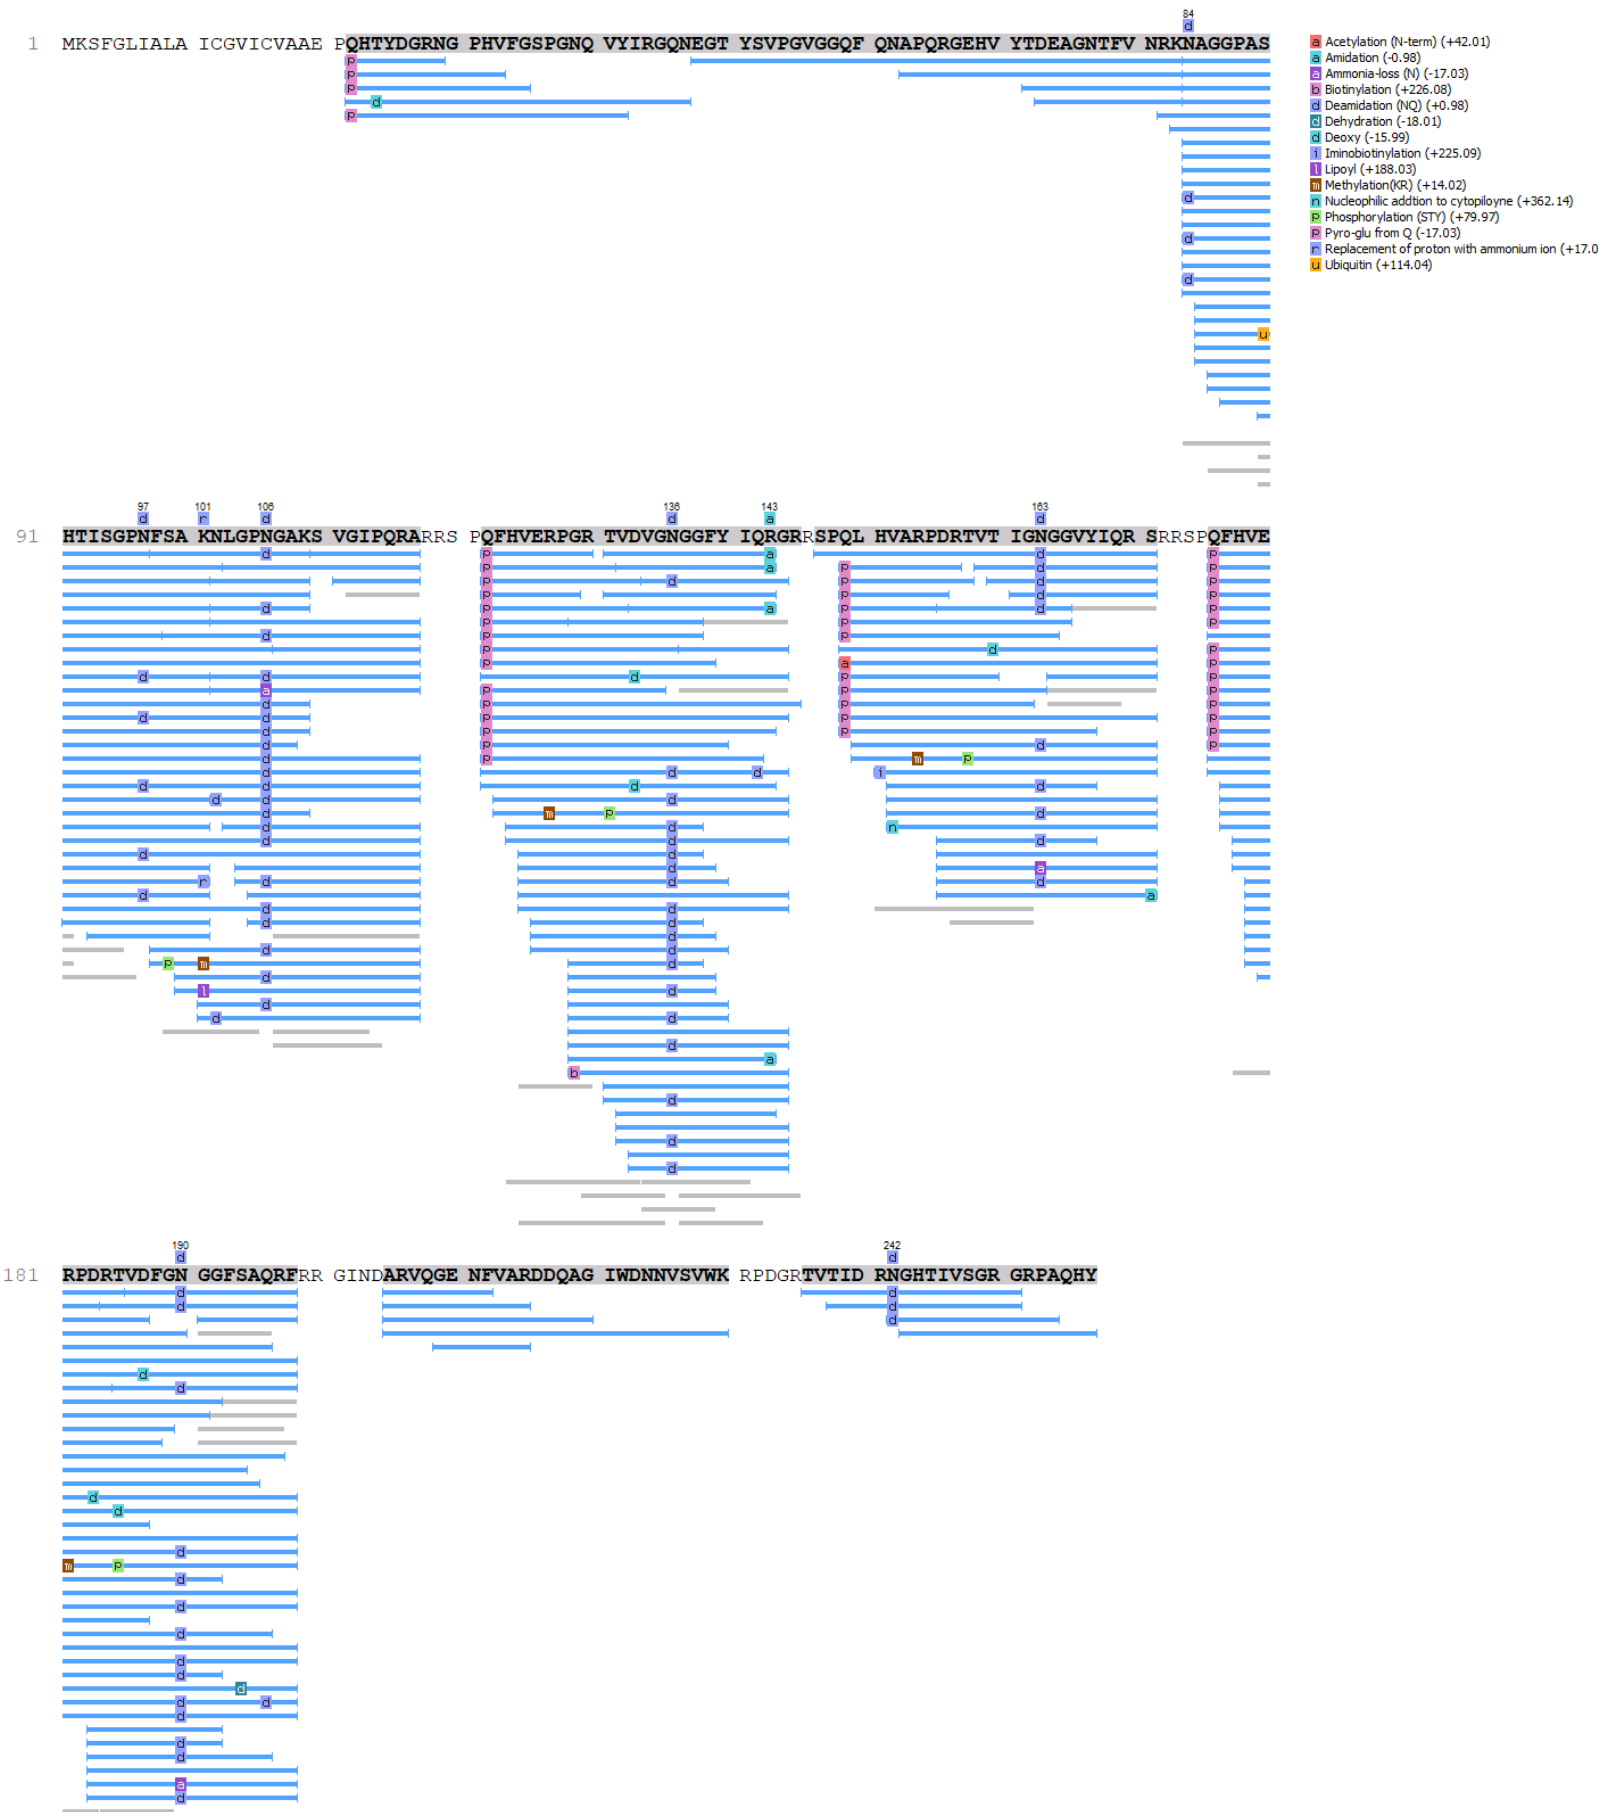

# A *Figure S3*

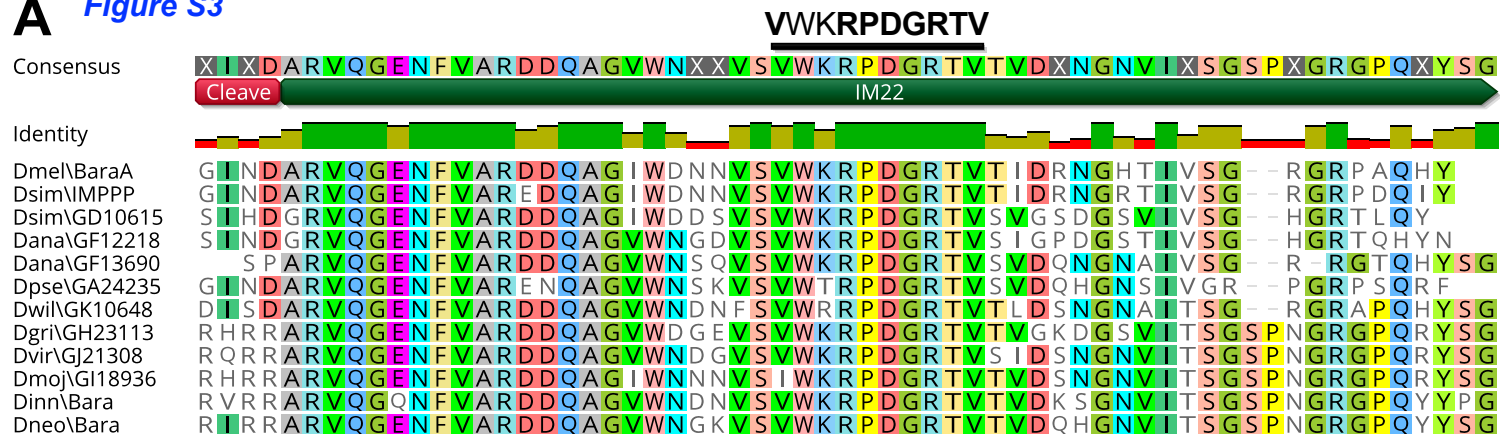

# B **VXRPRXRTV**

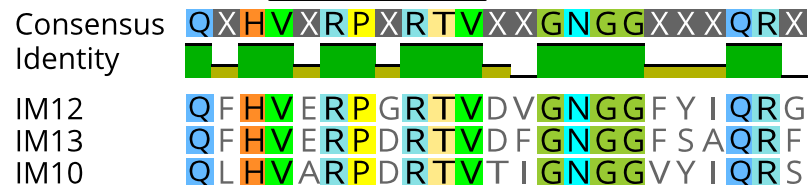

## Legend A-F:

... +; Rel, spz

— Act&gt;BaraA; Rel, spz

- - - OR-R

A

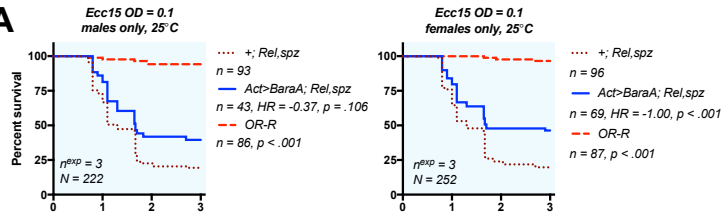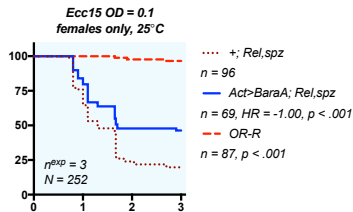

D

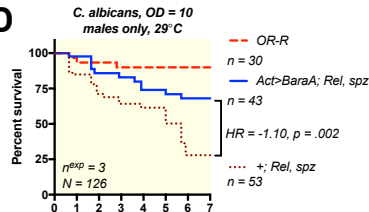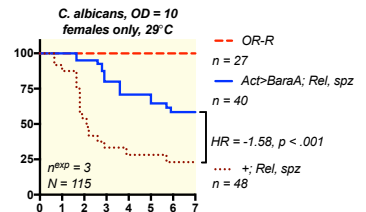

B

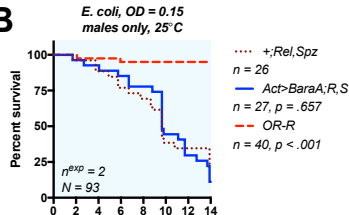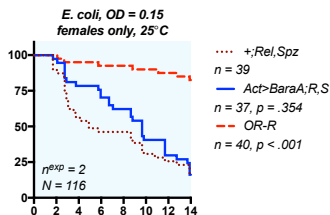

E

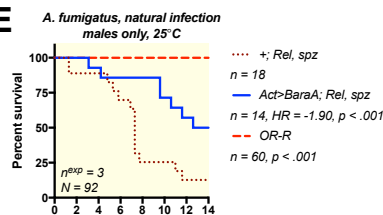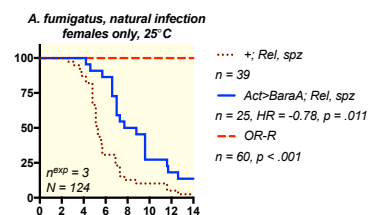

C

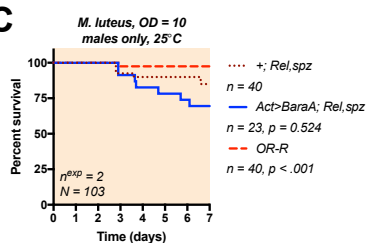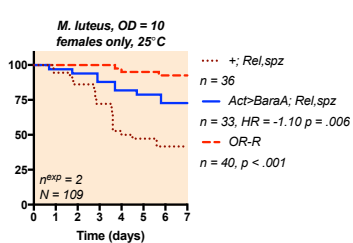

F

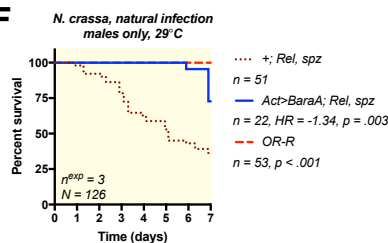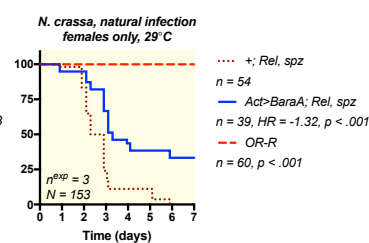

**A****Figure S5*****BomBc3* 18hpi*****E. coli* + *M. luteus* cocktail**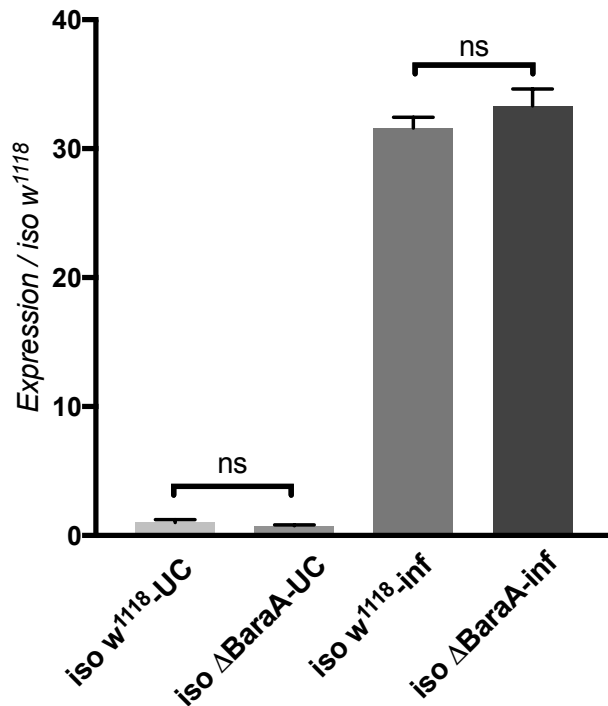**B*****Drs* 18hpi*****E. coli* + *M. luteus* cocktail**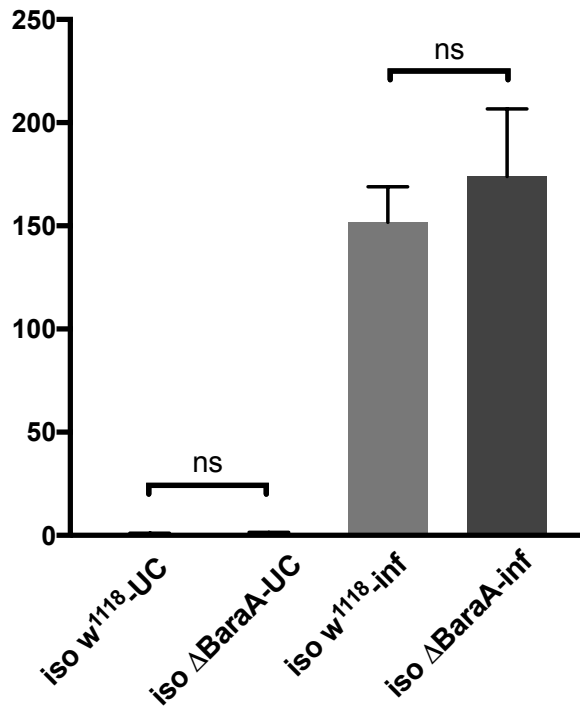**C*****DptA* 18hpi*****E. coli* + *M. luteus* cocktail**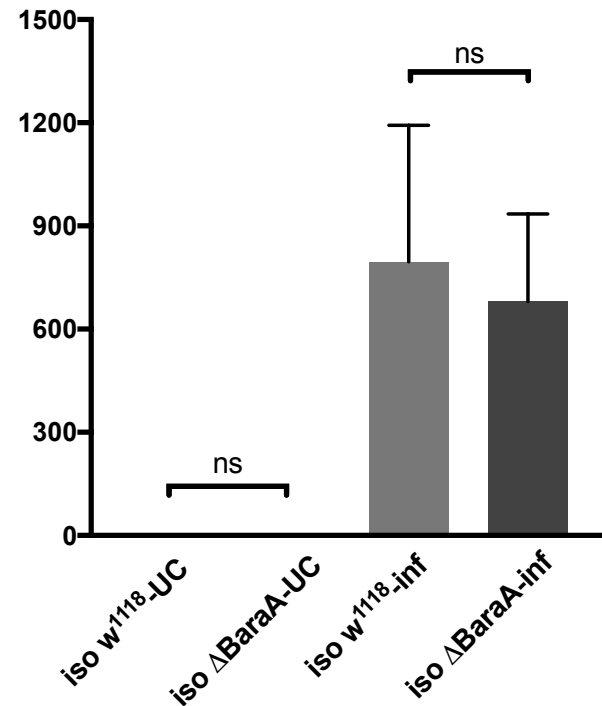

**Figure S6**

**A**

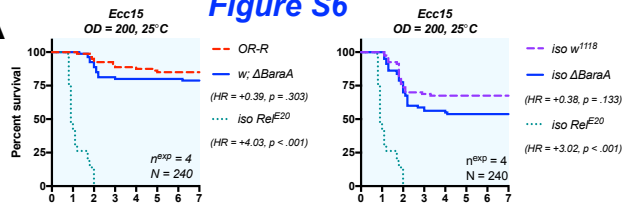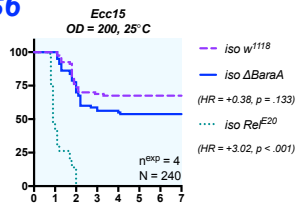

**D**

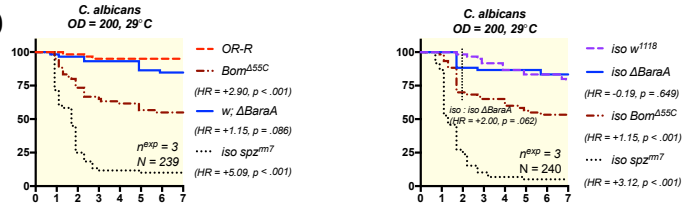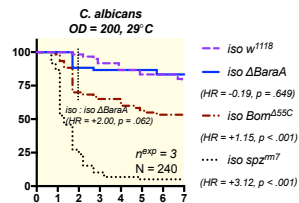

**B**

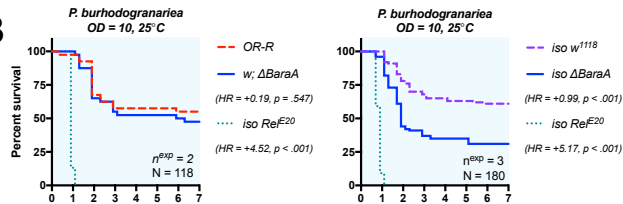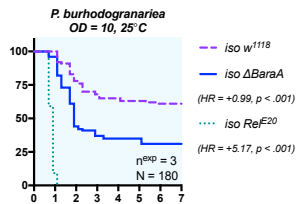

**E**

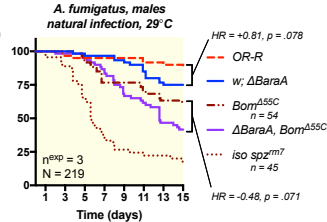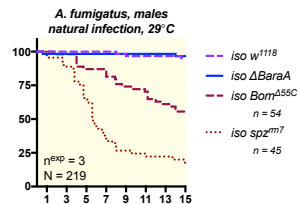

**C**

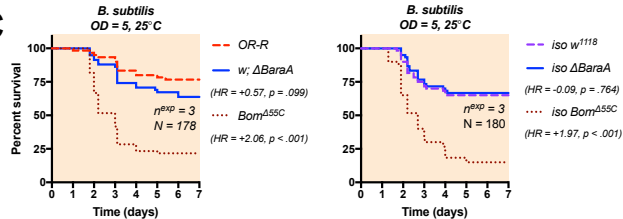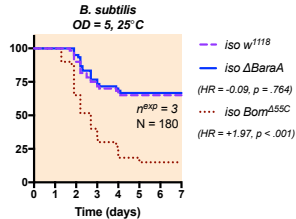

**F**

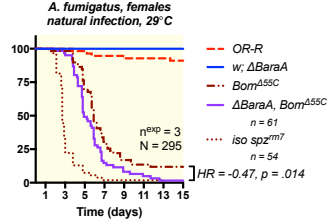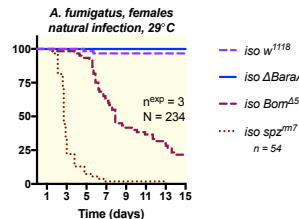

**Figure S7**

**A**

*E. faecalis*  
OD = 5, 25°C

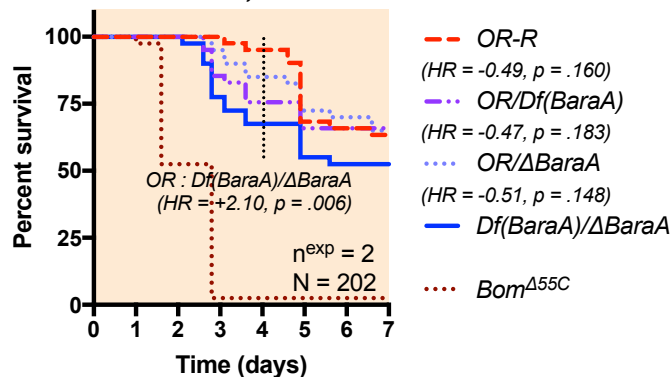

*E. faecalis*  
OD = 5, 25°C

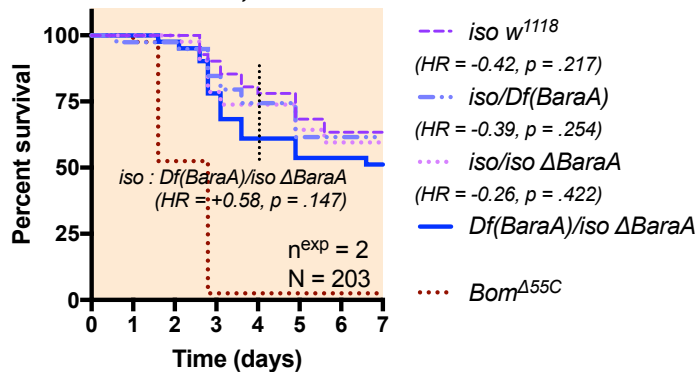

**B**

*E. faecalis*  
OD = 5, 25°C

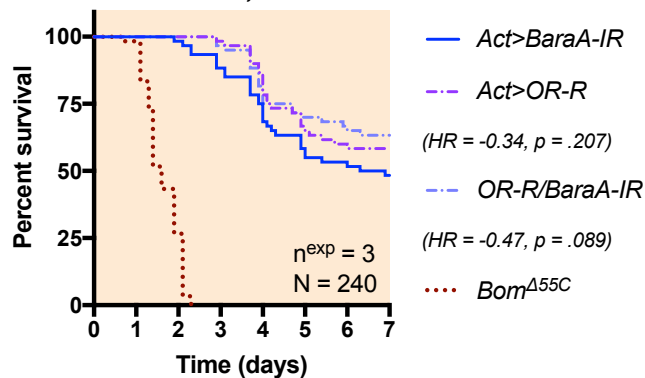



**A** Figure S8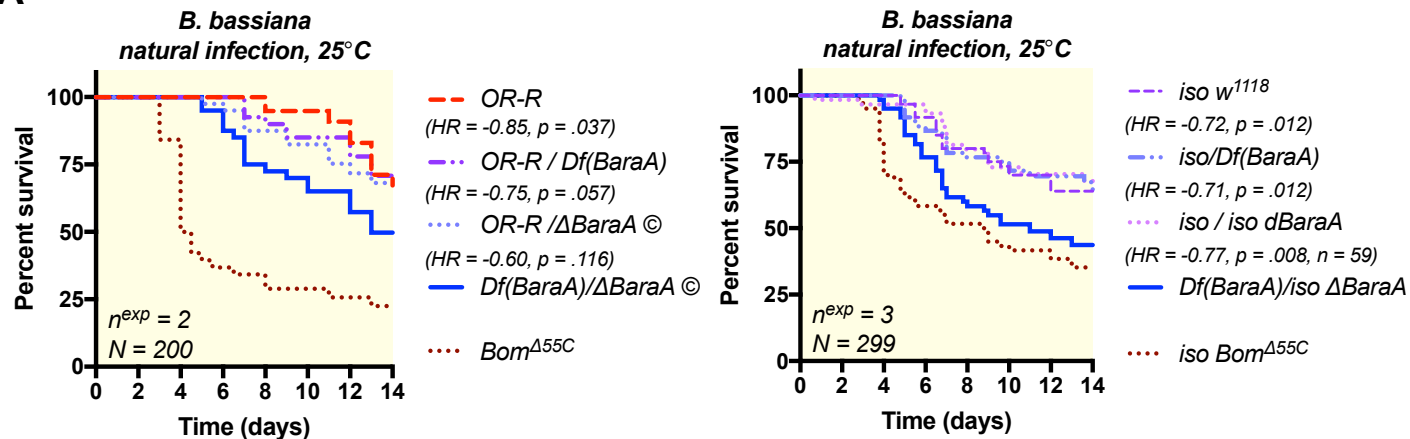**B**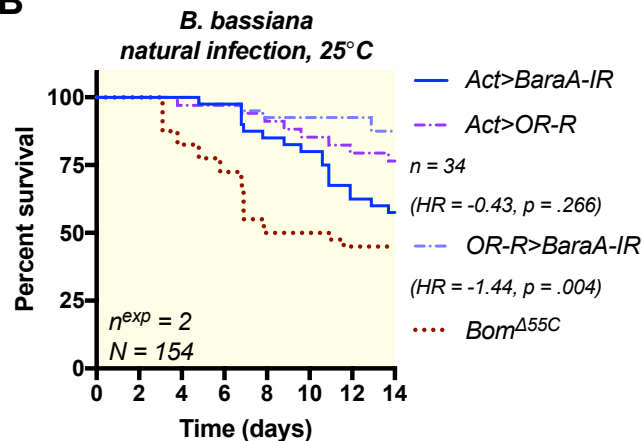**C**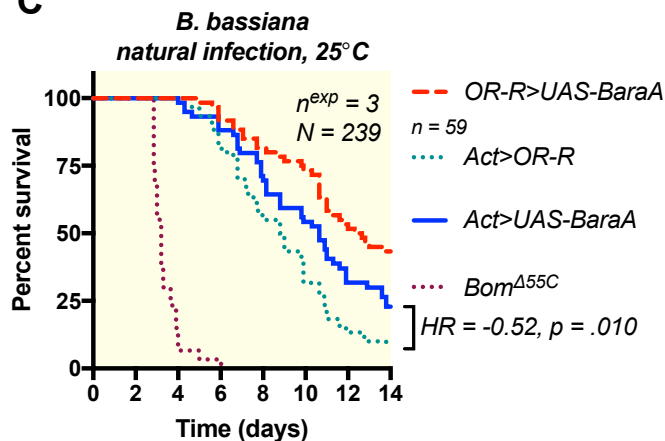

# A

## Figure S9

Clean injury,  
males at 25°C  
 $n^{\text{exp}} = 2$

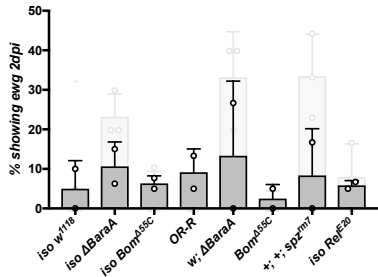

# B

Ecc15 OD=200,  
males at 25°C  
 $n^{\text{exp}} = 2$

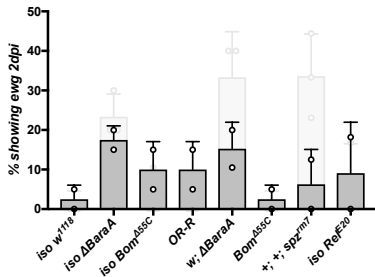

# C

*E. faecalis* OD = 5,  
transheterozygote  
males at 25°C

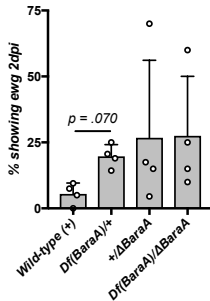

**Table S1**

| Treatment                       |                | Percent (%) males showing ewg |                    |                    |                                |                               |                 |                   |                            |                                 |                               |                                             |
|---------------------------------|----------------|-------------------------------|--------------------|--------------------|--------------------------------|-------------------------------|-----------------|-------------------|----------------------------|---------------------------------|-------------------------------|---------------------------------------------|
| Pathogen                        | n exp          | dpi ewg taken                 | iso <i>DrosDel</i> | iso $\Delta$ BaraA | iso <i>Bom</i> <sup>ASSC</sup> | iso <i>spz</i> <sup>rm7</sup> | OR-R            | w; $\Delta$ BaraA | <i>Bom</i> <sup>ASSC</sup> | +; +; <i>spz</i> <sup>rm7</sup> | iso <i>Rel</i> <sup>E20</sup> | <i>Bom</i> <sup>ASSC</sup> , $\Delta$ BaraA |
| Clean Injury                    | 2              | 2                             | 5.0 ± 7.1          | 10.6 ± 6.2         | 6.3 ± 1.9                      |                               | 9.2 ± 5.9       | 13.3 ± 18.9       | 2.6 ± 3.7                  | 8.3 ± 11.2                      | 5.8 ± 1.2                     |                                             |
| HK-E. faecalis (OD100)          | 3              | 2                             | 1.7 ± 2.9          | 23.3 ± 5.8         | 3.5 ± 6.1                      |                               | 1.7 ± 2.9       | 33.3 ± 11.6       | 1.7 ± 2.9                  | 33.6 ± 10.1                     | 8.1 ± 8.3                     |                                             |
| E. faecalis (OD5)               | 4              | 2                             | 1.3 ± 2.5          | 23.8 ± 11.1        | 6.1 ± 1.2                      |                               | 10.5 ± 3.2      | 60.9 ± 24.4       | 3.8 ± 4.8                  | 20.2 ± 3.8                      | 3.4 ± 4.1                     |                                             |
| B. subtilis                     | 1              | 2                             | 0.0                | 30.0               | 5.0                            |                               | 25.0            | 40.0              | 5.0                        |                                 |                               |                                             |
| A. fumigatus                    | 4 or indicated | 6                             | 0.0 ± 0.0          | 10.6 ± 6.6         | 2.5 ± 5.0                      | 51.3 ± 15.9 (n=2)             | 0.0 ± 0.0 (n=3) | 50 ± 44.5 (n=3)   | 0.0 ± 0.0 (n=2)            |                                 |                               | 5.0 ± 7.1 (n=2)                             |
| B. bassiana (sporulating plate) | 3              | 3                             | 10.0 ± 0.0         | 31.5 ± 24.5        | 11.5 ± 16.0                    |                               |                 |                   |                            |                                 |                               |                                             |
| B. bassiana R444                | 3              | 5                             | 0.0 ± 0.0          | 15.2 ± 8.7         | 0.0 ± 0.0                      |                               | 1.7 ± 1.0       | 15.0 ± 8.6        | 0.0 ± 0.0                  | 22.2 ± 15.6                     |                               | 14.3 ± 10.0                                 |
| M. rileyi PHP1705               | 4 or indicated | 5                             | 0.0 ± 0.0 (n=2)    | 15.0 ± 7.1 (n=2)   | 2.8 ± 3.9 (n=2)                |                               | 2.8 ± 3.3       | 18.1 ± 13.8       | 0.0 ± 0.0                  | 11.2 ± 8.8                      |                               | 23.2 ± 11.9                                 |
| Ecc15                           | 2              | 2                             | 2.5 ± 3.5          | 17.5 ± 3.5         | 10.0 ± 7.1                     |                               | 10.0 ± 7.1      | 15.3 ± 6.7        | 2.5 ± 3.5                  | 6.3 ± 8.8                       |                               |                                             |

  

| Treatment         |       | Percent (%) males showing ewg |                    |            |                        |                          |           |            |                      |                         |  |  |
|-------------------|-------|-------------------------------|--------------------|------------|------------------------|--------------------------|-----------|------------|----------------------|-------------------------|--|--|
| Pathogen          | n exp | dpi ewg taken                 | iso <i>DrosDel</i> | Df(I)/iso  | iso $\Delta$ BaraA/iso | Df(I)/iso $\Delta$ BaraA | OR-R      | Df(I)/OR   | w; $\Delta$ BaraA/OR | Df(I)/w; $\Delta$ BaraA |  |  |
| E. faecalis (OD5) | 2     | 2                             | 1.7 ± 2.9          | 17.4 ± 4.5 | 11.0 ± 9.2             | 12.5 ± 3.5               | 9.0 ± 1.3 | 22.0 ± 4.2 | 42.5 ± 38.9          | 42.5 ± 24.7             |  |  |

## Supplementary information:

### ***Identification of the BaraA C-terminus as IM22 from Uttenweiler-Joseph et al.***

In 1998, Uttenweiler-Joseph et al. [4] described 24 immune-induced molecules by MALDI-TOF and informed predictions suggested that *BaraA* could encode several of them [2]. We generated a knock out mutant for the *BaraA* gene (*BaraA<sup>SW1</sup>*), which we validated by MALDI-TOF peptidomic analysis. Strikingly, we noticed an immune-induced peak at ~5981 Da in Linear mode collections that is absent in  $\Delta$ *BaraA* flies (**Fig. 2A**); this mass closely resembled the 5984 Da estimated mass of IM22 from Uttenweiler-Joseph et al. [4], for which sequence was never determined. We took the Linear masses reported for then-unknown IMs from Uttenweiler-Joseph et al. [4] and post-hoc generated a standard curve with now-confirmed mass values from Levy et al. [2]. Our post-hoc standard curve corrects the mass of IM22 as found in Uttenweiler-Joseph et al. [4] to be 5973.5 Da. Using the same approach with our own linear data we find a mass of 5975.1 Da for our 5981 Da peak (**Supplementary data file 1**). With LCMS proteomics, we confirmed that the *BaraA* C-terminus is cleaved to remove 4 N-terminal residues, which should produce a putative 5974.5 Da peptide (**Fig S2**). Together these observations indicate the *BaraA* C-terminus encodes the following 53-residue mature peptide, matching the estimated mass of IM22: ARVQGENFVA RDDQAGIWDN NVSVWKRPDG RTVTIDRNGH TIVSGRGRPA QHY.

The *BaraA* gene is therefore involved in the production of over one third of the classical *Drosophila* IMs from Uttenweiler-Joseph et al. [4], including: IM5, 6, 8, 10, 12, 13, 20 (doubly-charged IM24 [2]), 22, and 24.

## Sequence of the BaraA-Gal4 promoter construct

The following 1675bp sequence was cloned from the DrosDel isogenic background into the pBPGUw vector to drive a downstream Gal4 gene, and inserted into the VK33 attP docking site using BDSC line #24871:

*Dif/dorsal binding site:* **GGGHHNNDVH**

*Rel binding site:* **GGRDNNHHBS**

>iso\_DrosDel\_BaraA\_promoter-Gal4

CTGCTACTCCTCTACACATTCGACTCCTTCGCCTTGCTGGCTGGGAAAAAATTTTGCATA  
ATTTATGTGGGTGCCGCGCACACGGAGGTCCCGACGGATTCTGAAGTATCCGAAGGATTCG  
AAAGGAAAACAACGCACGAGCACCACGGCCAACTGATTTAAATGCAATTGCACTGAAGT  
ATTTTGTGTGGCGAACGAAGCTGGATGAAATAGGGGGGTGTGGGGTTTTCTATTGAGAC  
ATCTGCACGTGCAACCGGAAACATCCGAAGAGAACAGCACAGGCCGGGCTACGCCGGGCA  
ATTTCTTTTCATTTGCCAAGGTGTTGAGTTGCACCAACATTCGACATCGACGTGGCCAGA  
AGCCAACAAAAGCCAAGAGCCAAACCCCTTTTTGTGGTCACAAGTGTCTGTCTATTTGTCTG  
TGGGCATCTTGGGCACCTTGGGCATCCTCGACATCCTTGCCATTTTGGTCTGGCCAAGAC  
AAACAACCAGCAAATTTAGTGTATTTTGTGCATTTTAAAAATTGTCCAAATTTATGTGA  
CACGCTGCGCCAATTGATCAGATTAATAAACATGAGGCCAAGCGAATCGAATTTGGCT  
TCACCAAGAAGACAATGCAGTCTGTATTCAAATGGGTGGGCGCATCCACCAAGCGGTGA  
ATACAGTGACCGCTCGCTATAATGGACGGTCAGGTGTTACTTTAACTTAAAAAATATG  
TAACAAATCTTATCAAGTTTGAAATAGATTGAAATAGATTTGGTTATTGCATTGCAAAG  
ATATATATTAAATTCGAATATTCGAAGAAATTTTCATGAGAATGTCACCTTATGTCATGAG  
ATTATATTAACGTACGAATAACAATGTATTTTCCAAAATTAAAAATAAAATTTAATTT  
AATTACGCAGTACCTTTACACTATCAGTCGGAGGTAATAACTCATATAATTAGATTAGC  
ATTAGATTTTAAAGCGAAAAACACTTAAAAGCTGAAATTATTAGACAACACTCTTAAAT  
TAGTCGAGCTGATATATAGCCTCAAGTTTTGCTTAAATCCAAAGATAAAGGAATGCCTT  
CAAAAATATATTTTGTTTTATACCAAGTGACAGCAGAGAATGGGGTTGCAATATCTTAA  
AAGAGTTTCACTTAGCCAATATTTACTGCCATTGTTGGCCACCAAATAGTAGCAACCAGA  
GACTTCCAGGAATATATTCTCGTGTCAAATGCAATCCACTTTAAATGCAACTATCTGGCG  
GCTAAGAAAACCCGACAGTTTGATTCAAGTCGACGAAACAATATAAGCACGTGCTAAAT  
AAAGAGACCTATGCAGTTAATACTCTTGTCATATTATAATATAATTTAGTGACATAAGT  
TGCATGGTATACGAGTACTGAACAAGTTATGGCAGCTTTTCCAAATAAGCGATCACATA  
TTCCGCGGGATGATGGGTGGATTCTAGCATATGTGGATGCTTAATGGCTTATTGCGGG  
TCAGGGCGGCGCAATCTGTTTCAAGAAATTCCTTGAACGCACACCCATTTCAGATCAGATTG  
TGACGTTTTGGGAAATTTCTTGACGATCGGTGTAAACAAGCTCAGCAACCAGATTCGATG  
GCTATTTGCCGGCTATAAATACTAGAAACCATTCGATTGCACTCAGTTGAAGCTGGGCTC  
TGGAACAGATCACA
